# Supplementary material
Source: Research Square preprint supplement (doi:10.21203/rs.3.rs-9932886/v1)
Supplement: Supplementary file 1 [file 6f862f20b6acdba3618a86c0.docx]

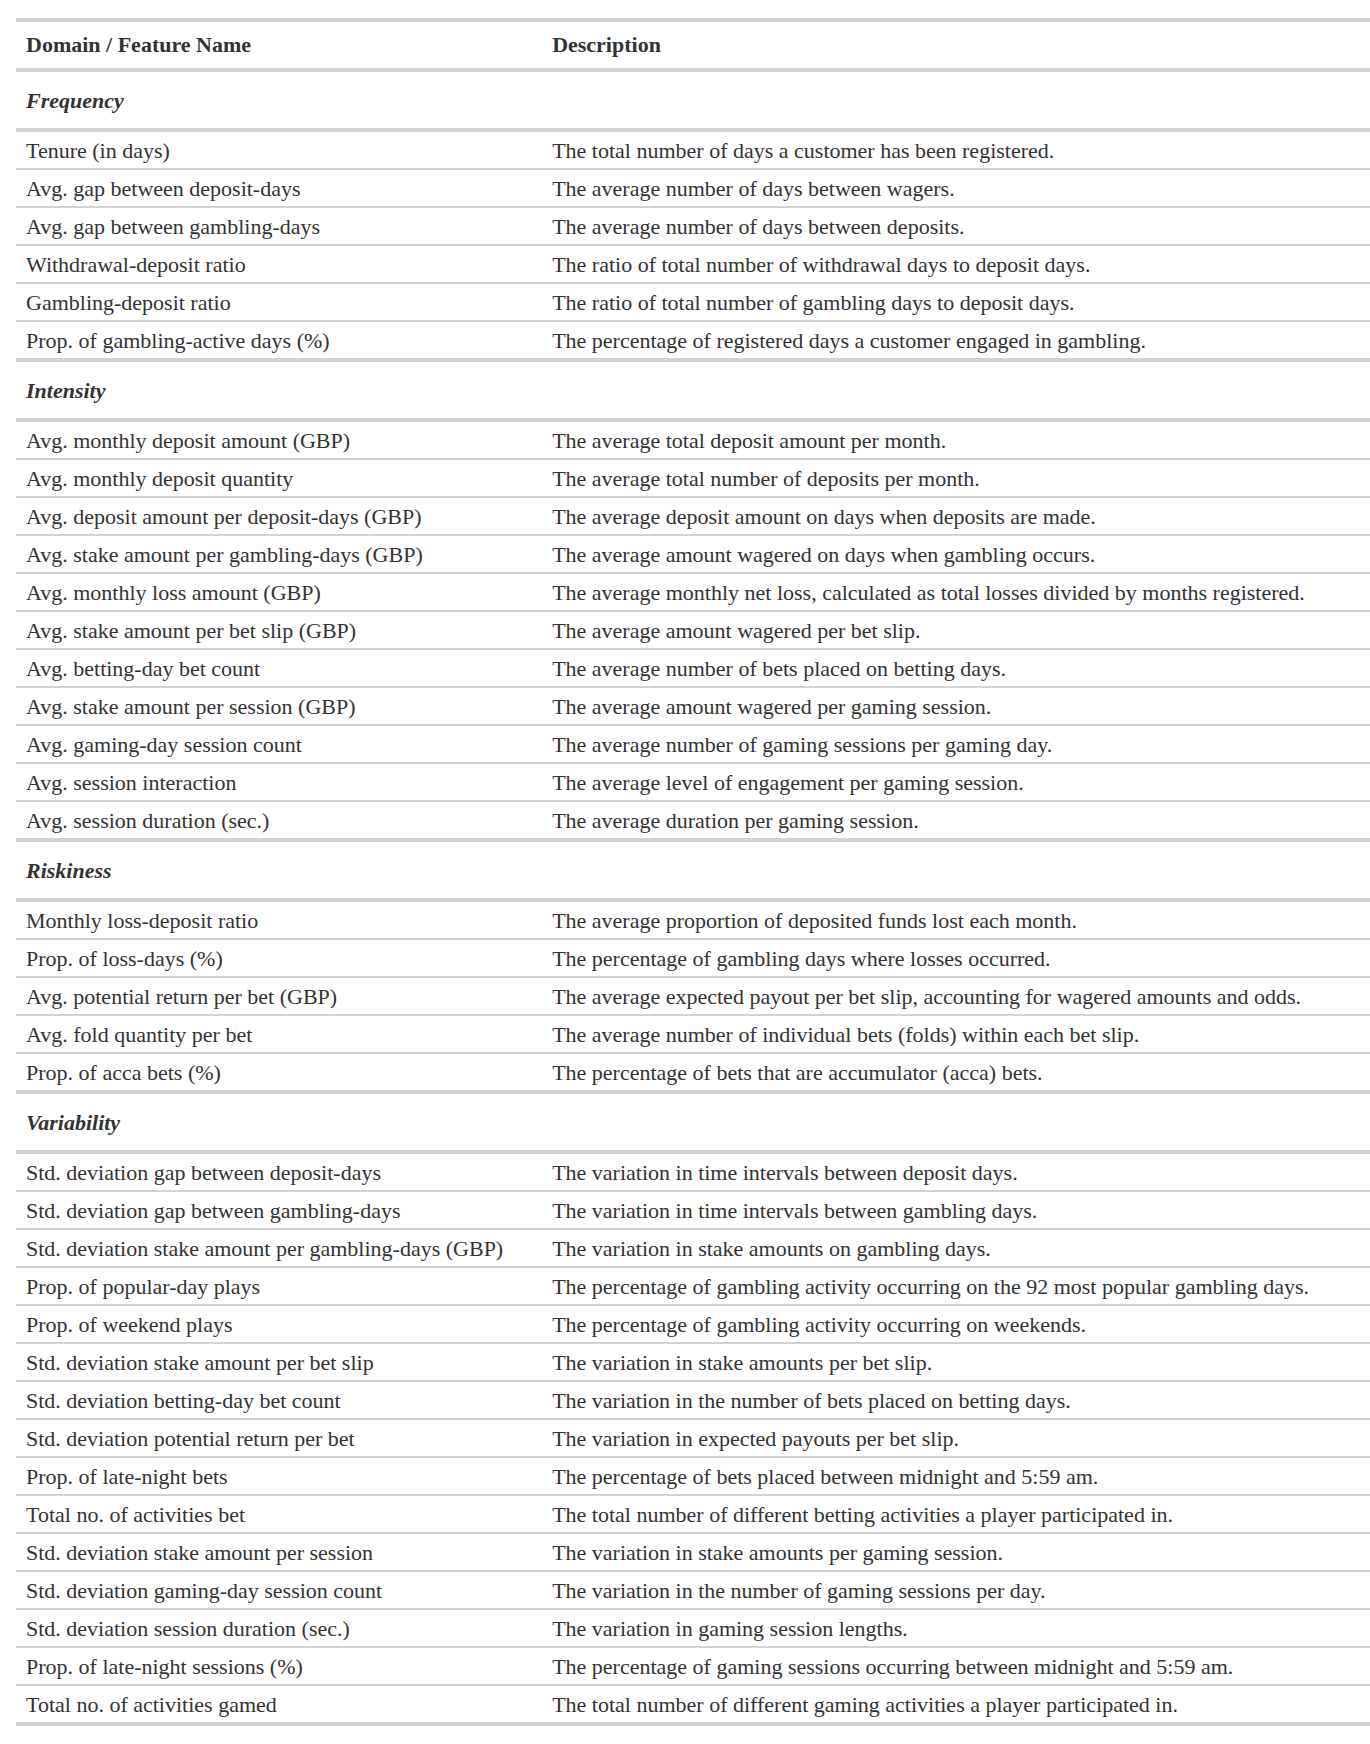


**Table 1.** The 37 behavioural features used as clustering inputs, organised into the four domains of frequency, intensity, riskiness and variability.


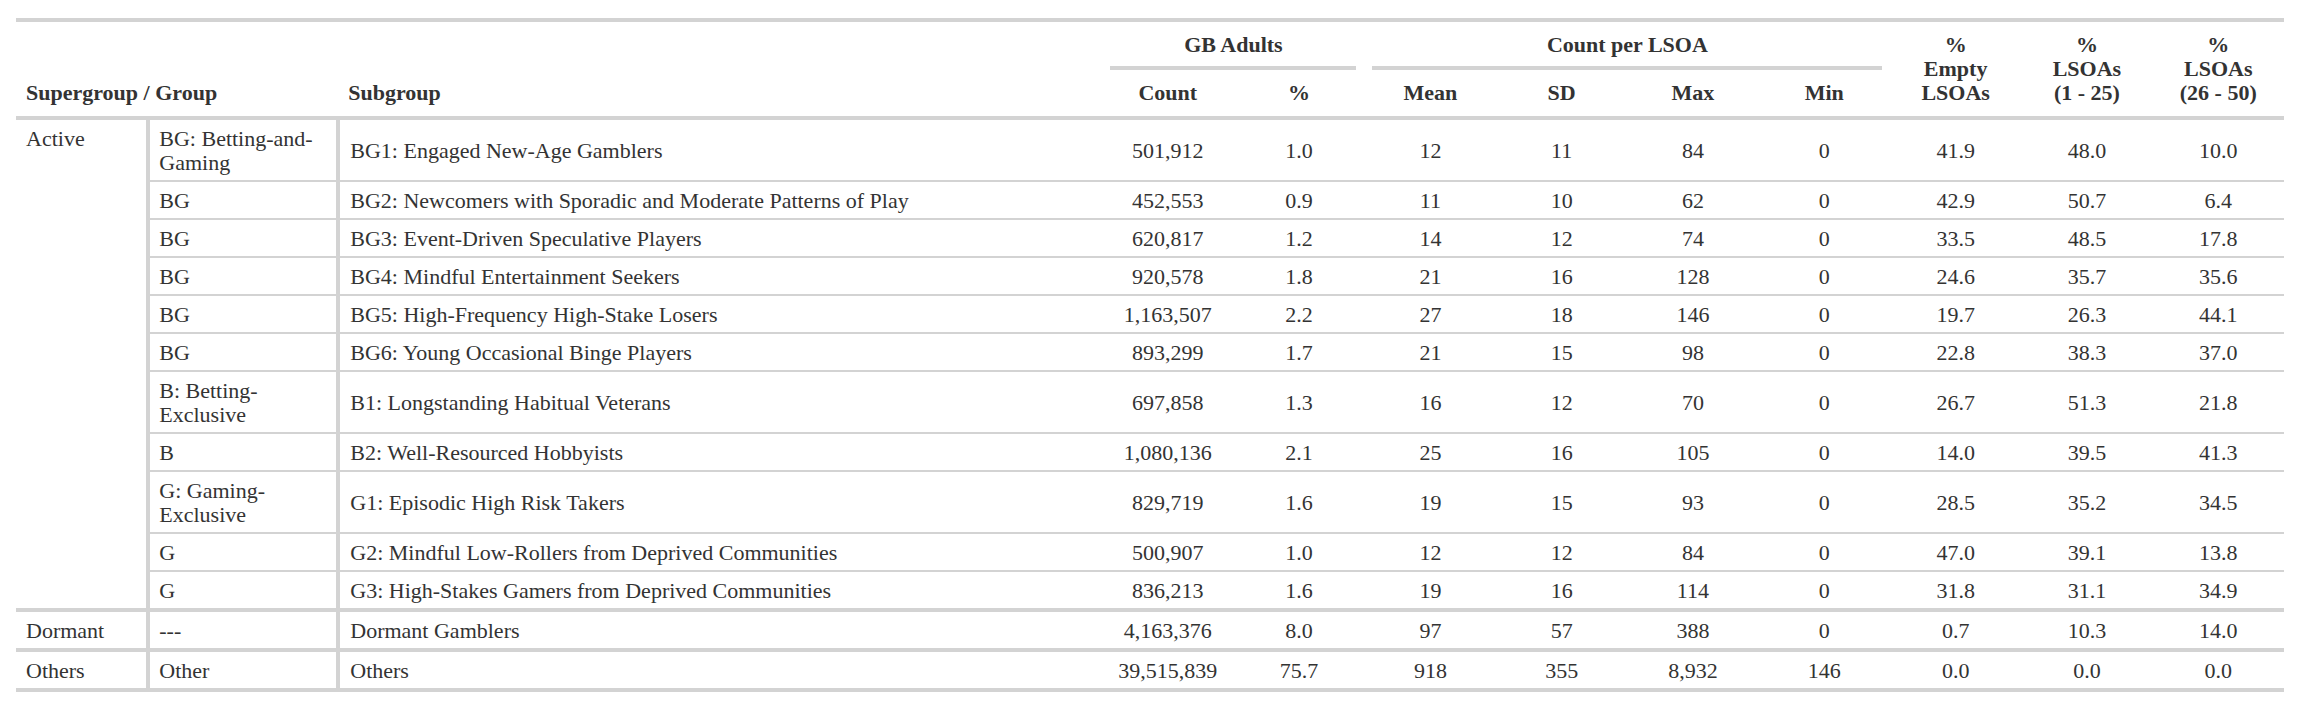


**Table 2.** Type names, population shares and core descriptive statistics for the 12-type classification (eleven active types plus Dormant).


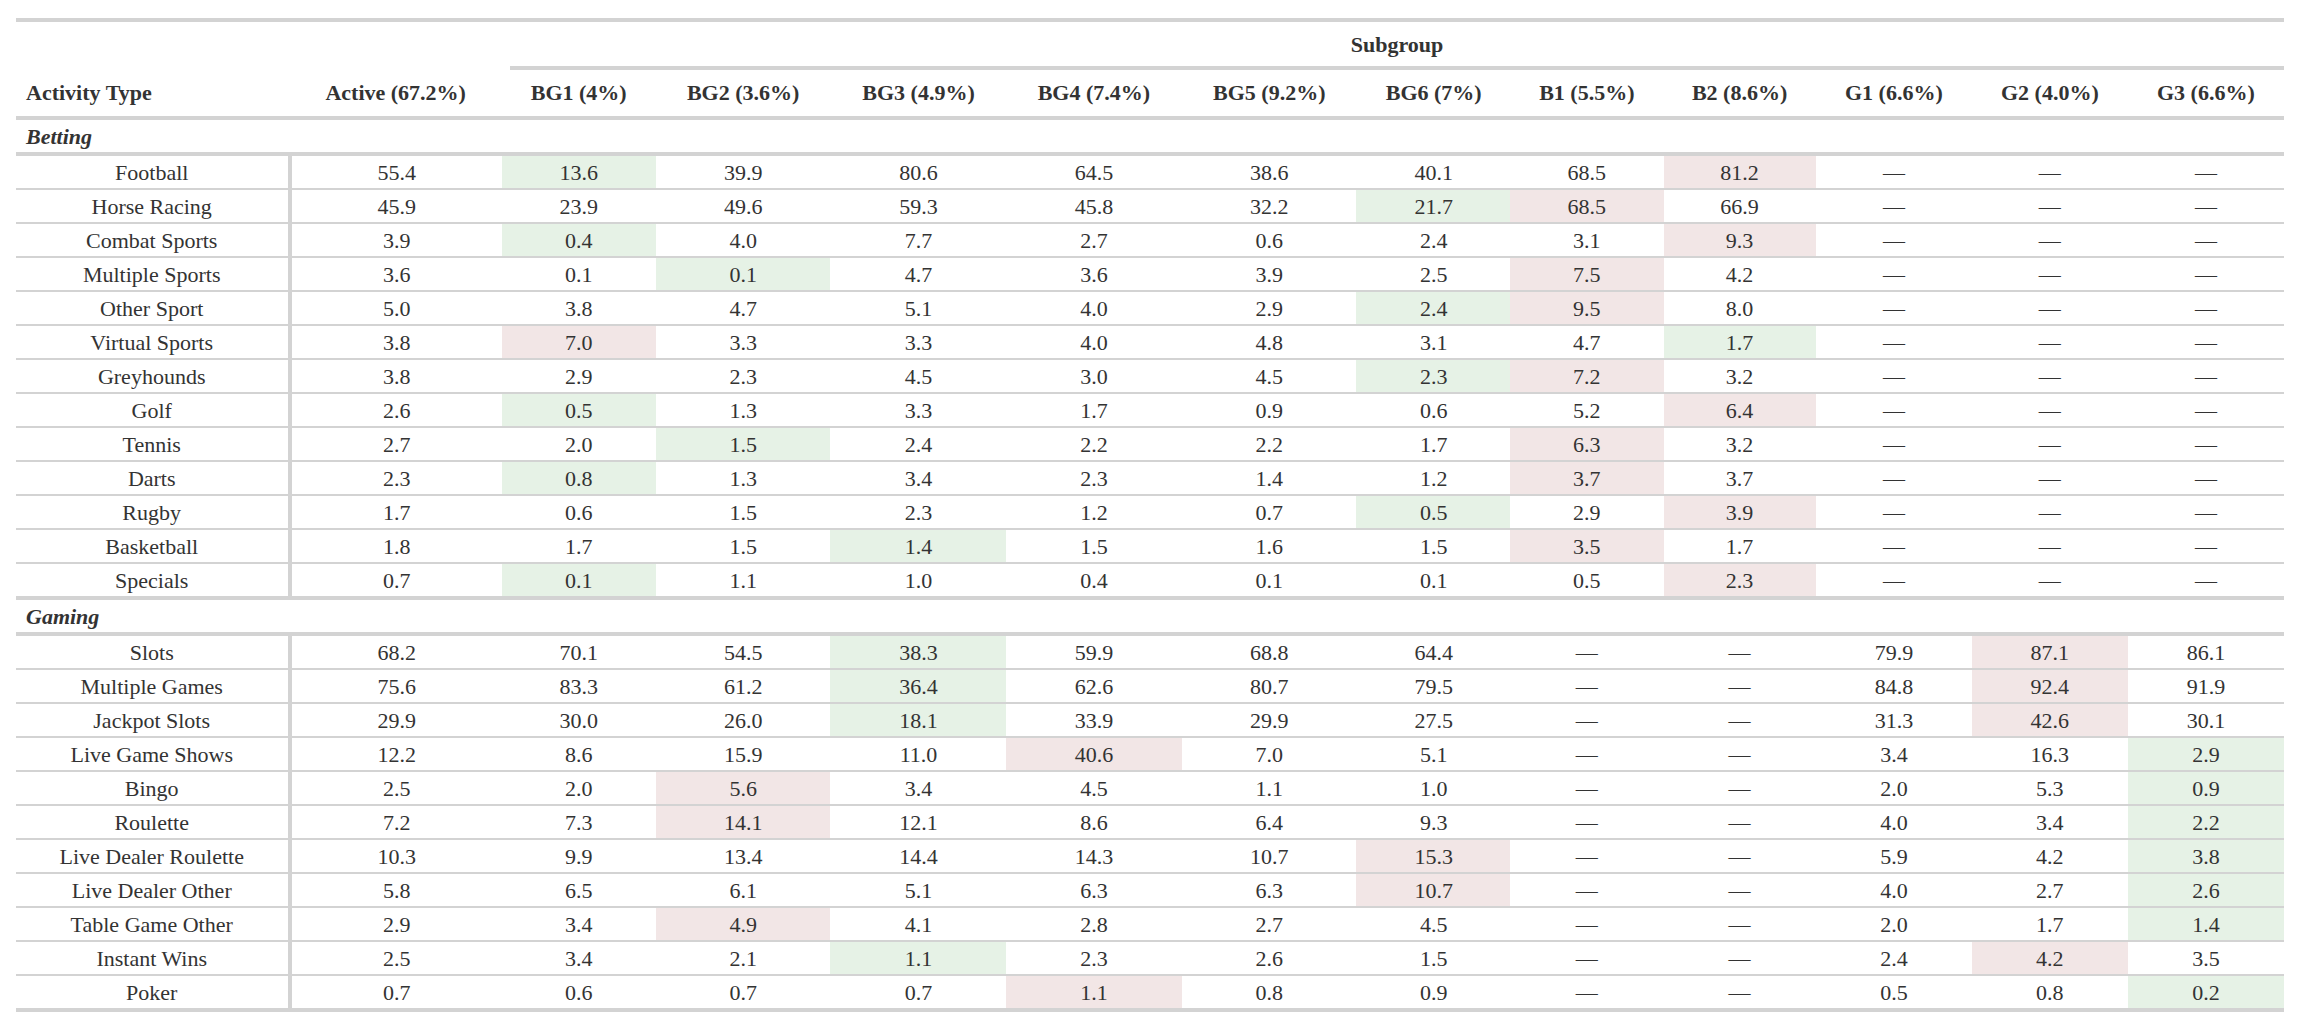


**Table 3.** Proportions of committed participants for each activity within each type, with row minima shown in green and row maxima in pink.
