# Supplementary material
Source: Research Square preprint supplement (doi:10.21203/rs.3.rs-9932886/v1)
Supplement: Supplementary file 2 [file bd47f81d85b09f7d336de3b8.docx]

SUPPLEMENTARY INFORMATION

Beyond aggregate spending: a behavioural typology of online gambling and its neighbourhood patterning in Great Britain

This document provides supplementary methodological figures and detailed cluster profile tables to accompany the manuscript.

## Glossary of terms

The following definitions apply throughout this document:

| **Term** | **Definition** |
| --- | --- |
| **Genuine Gamblers** | Individuals who hold a verified online account, who participated in at least one form of gambling using money (as opposed to free or demo modes) and made deposits on multiple days within a year. |
| **Active Gamblers** | Genuine Gamblers who meet the criteria for sustained gambling activity, including gambling at least once a month on average and maintaining an account tenure of over three months. |
| **Dormant Gamblers** | Genuine Gamblers who do not meet the additional criteria for Active Gamblers. |
| **Betting** | Gambling activities recorded through discrete bet slips, as with football, horse racing and combat sports bets. |
| **Gaming** | Gambling activities recorded as continuous sessions, including slots, jackpot slots and bingo. |
| **Committed participants** | Individuals who allocate more than 5% of their total stakes to a particular gambling activity. |
| **Acca bets** | Accumulator bets that combine multiple selections into a single bet slip, requiring all to win for a full payout. A *fold* refers to the number of selections (e.g., a four-fold has four bets). *Single-fold bets* are standalone wagers on individual outcomes. |
| **Long odds** | Bets with lower probability of occurrence but higher potential payouts, typically involving high-risk, high-reward profiles. |
| **Popular days** | The top 25% of days in the year with the highest participant counts. |
| **Multiple bets / multiple games** | Instances where a gambler bets on more than one activity within a single bet slip (betting) or session (gaming). |

## PCA diagnostics

The scree plot in [Figure SM.1](#fig-scree-all) summarises the retained principal-component structure used in the dimensionality-reduction stage. The component-feature correlation matrices in [Table SM.1](#fig-pc-corr-both), [Table SM.2](#fig-pc-corr-bet) and [Table SM.3](#fig-pc-corr-gam) provide the basis for interpreting the retained components across the Betting-and-Gaming (BG), Betting-Exclusive (B) and Gaming-Exclusive (G) groups.


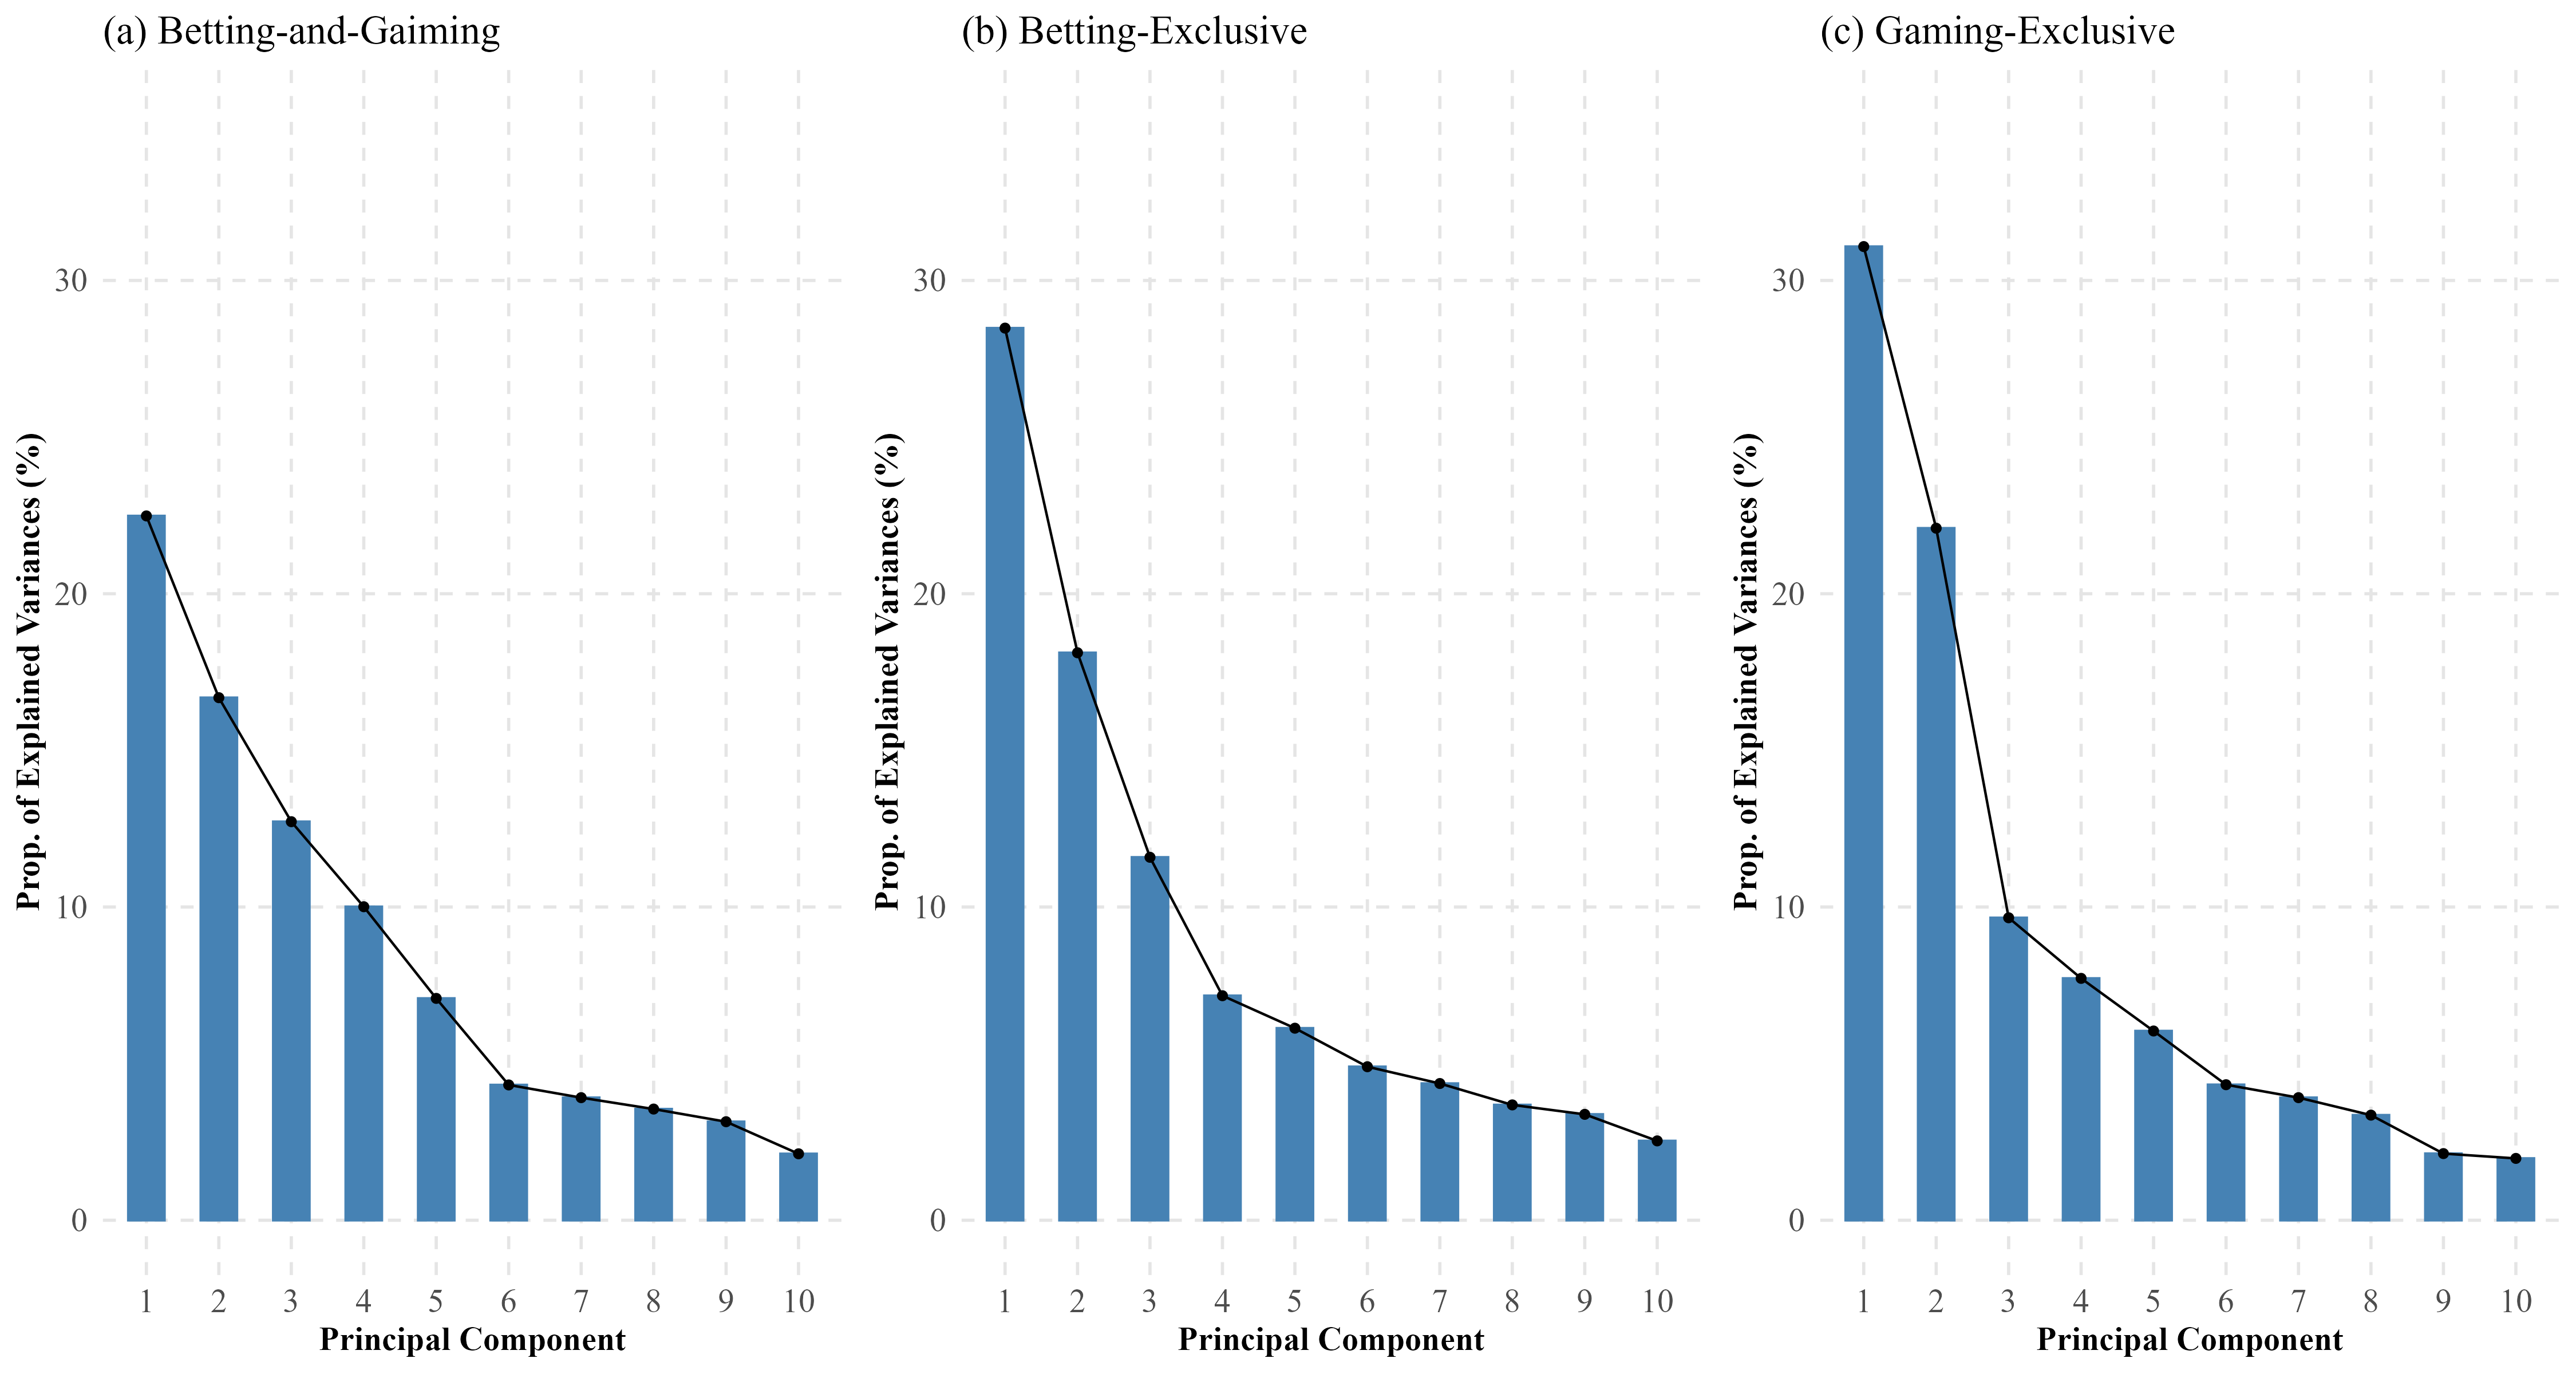


| Figure SM.1: Scree plot used to assess principal-component retention across the active gambling groups. |
| --- |


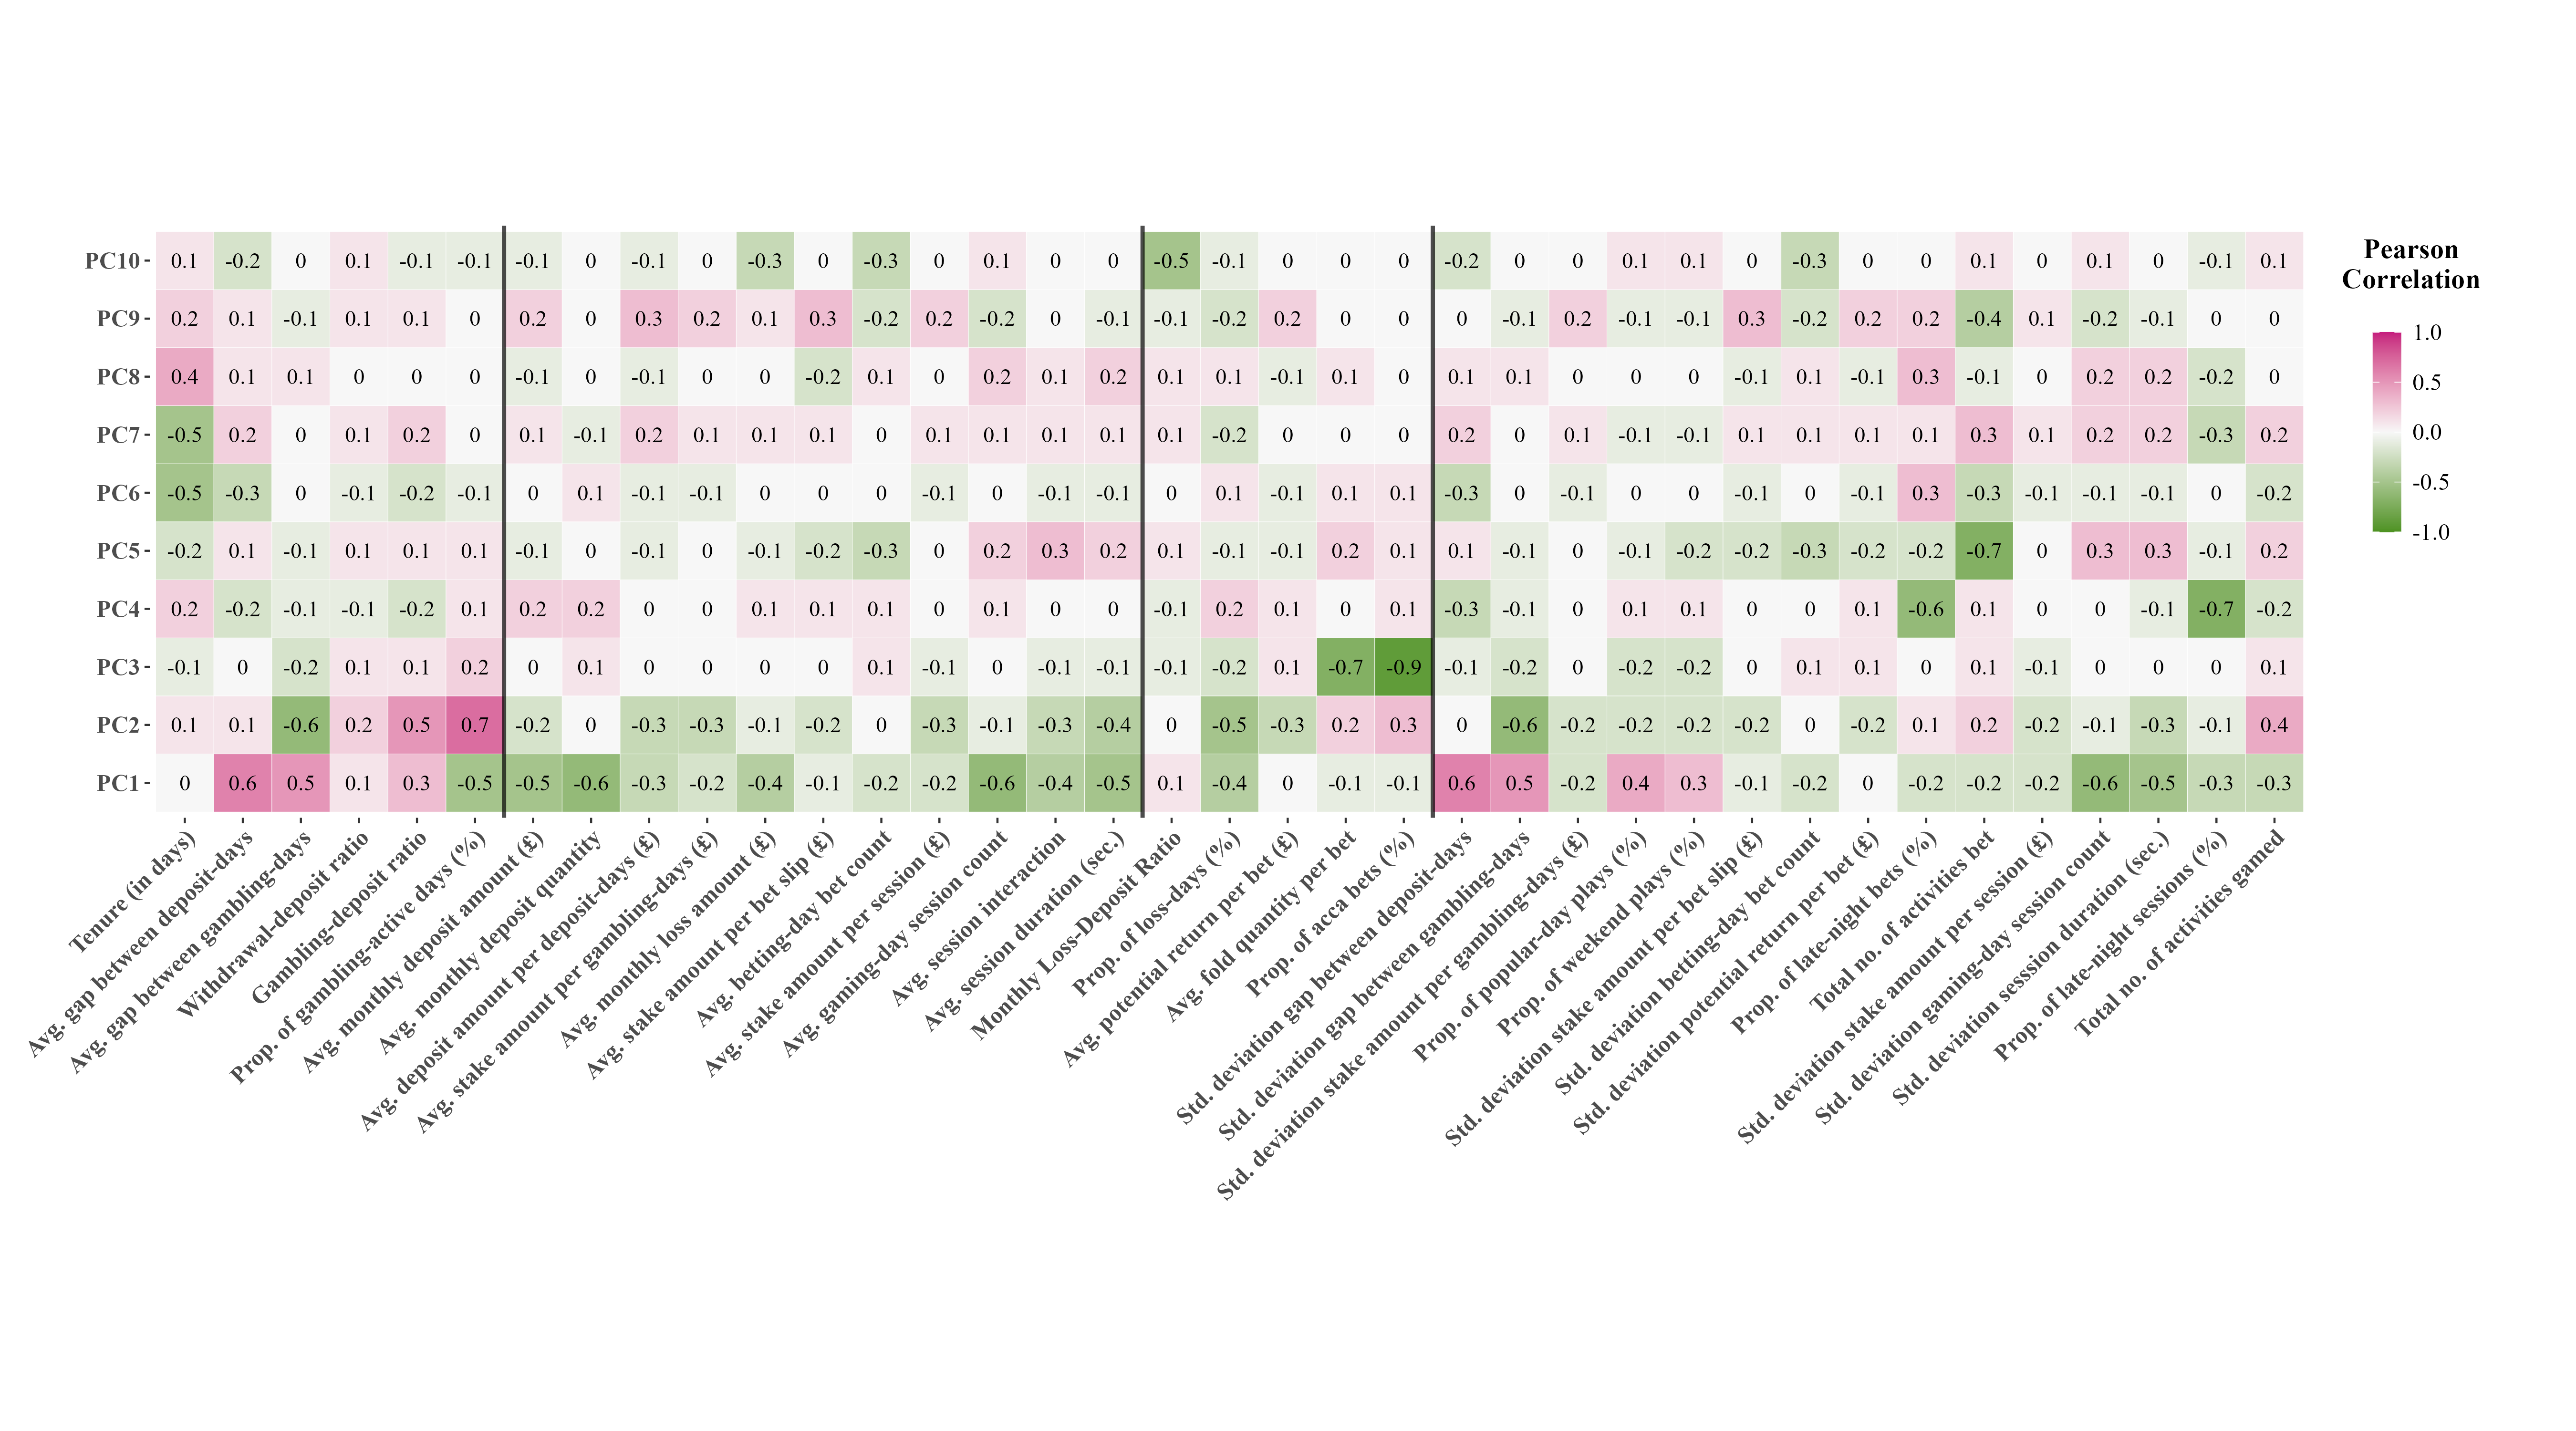


| Table SM.1: Component-feature correlation matrix for the Betting-and-Gaming (BG) group. |
| --- |

| 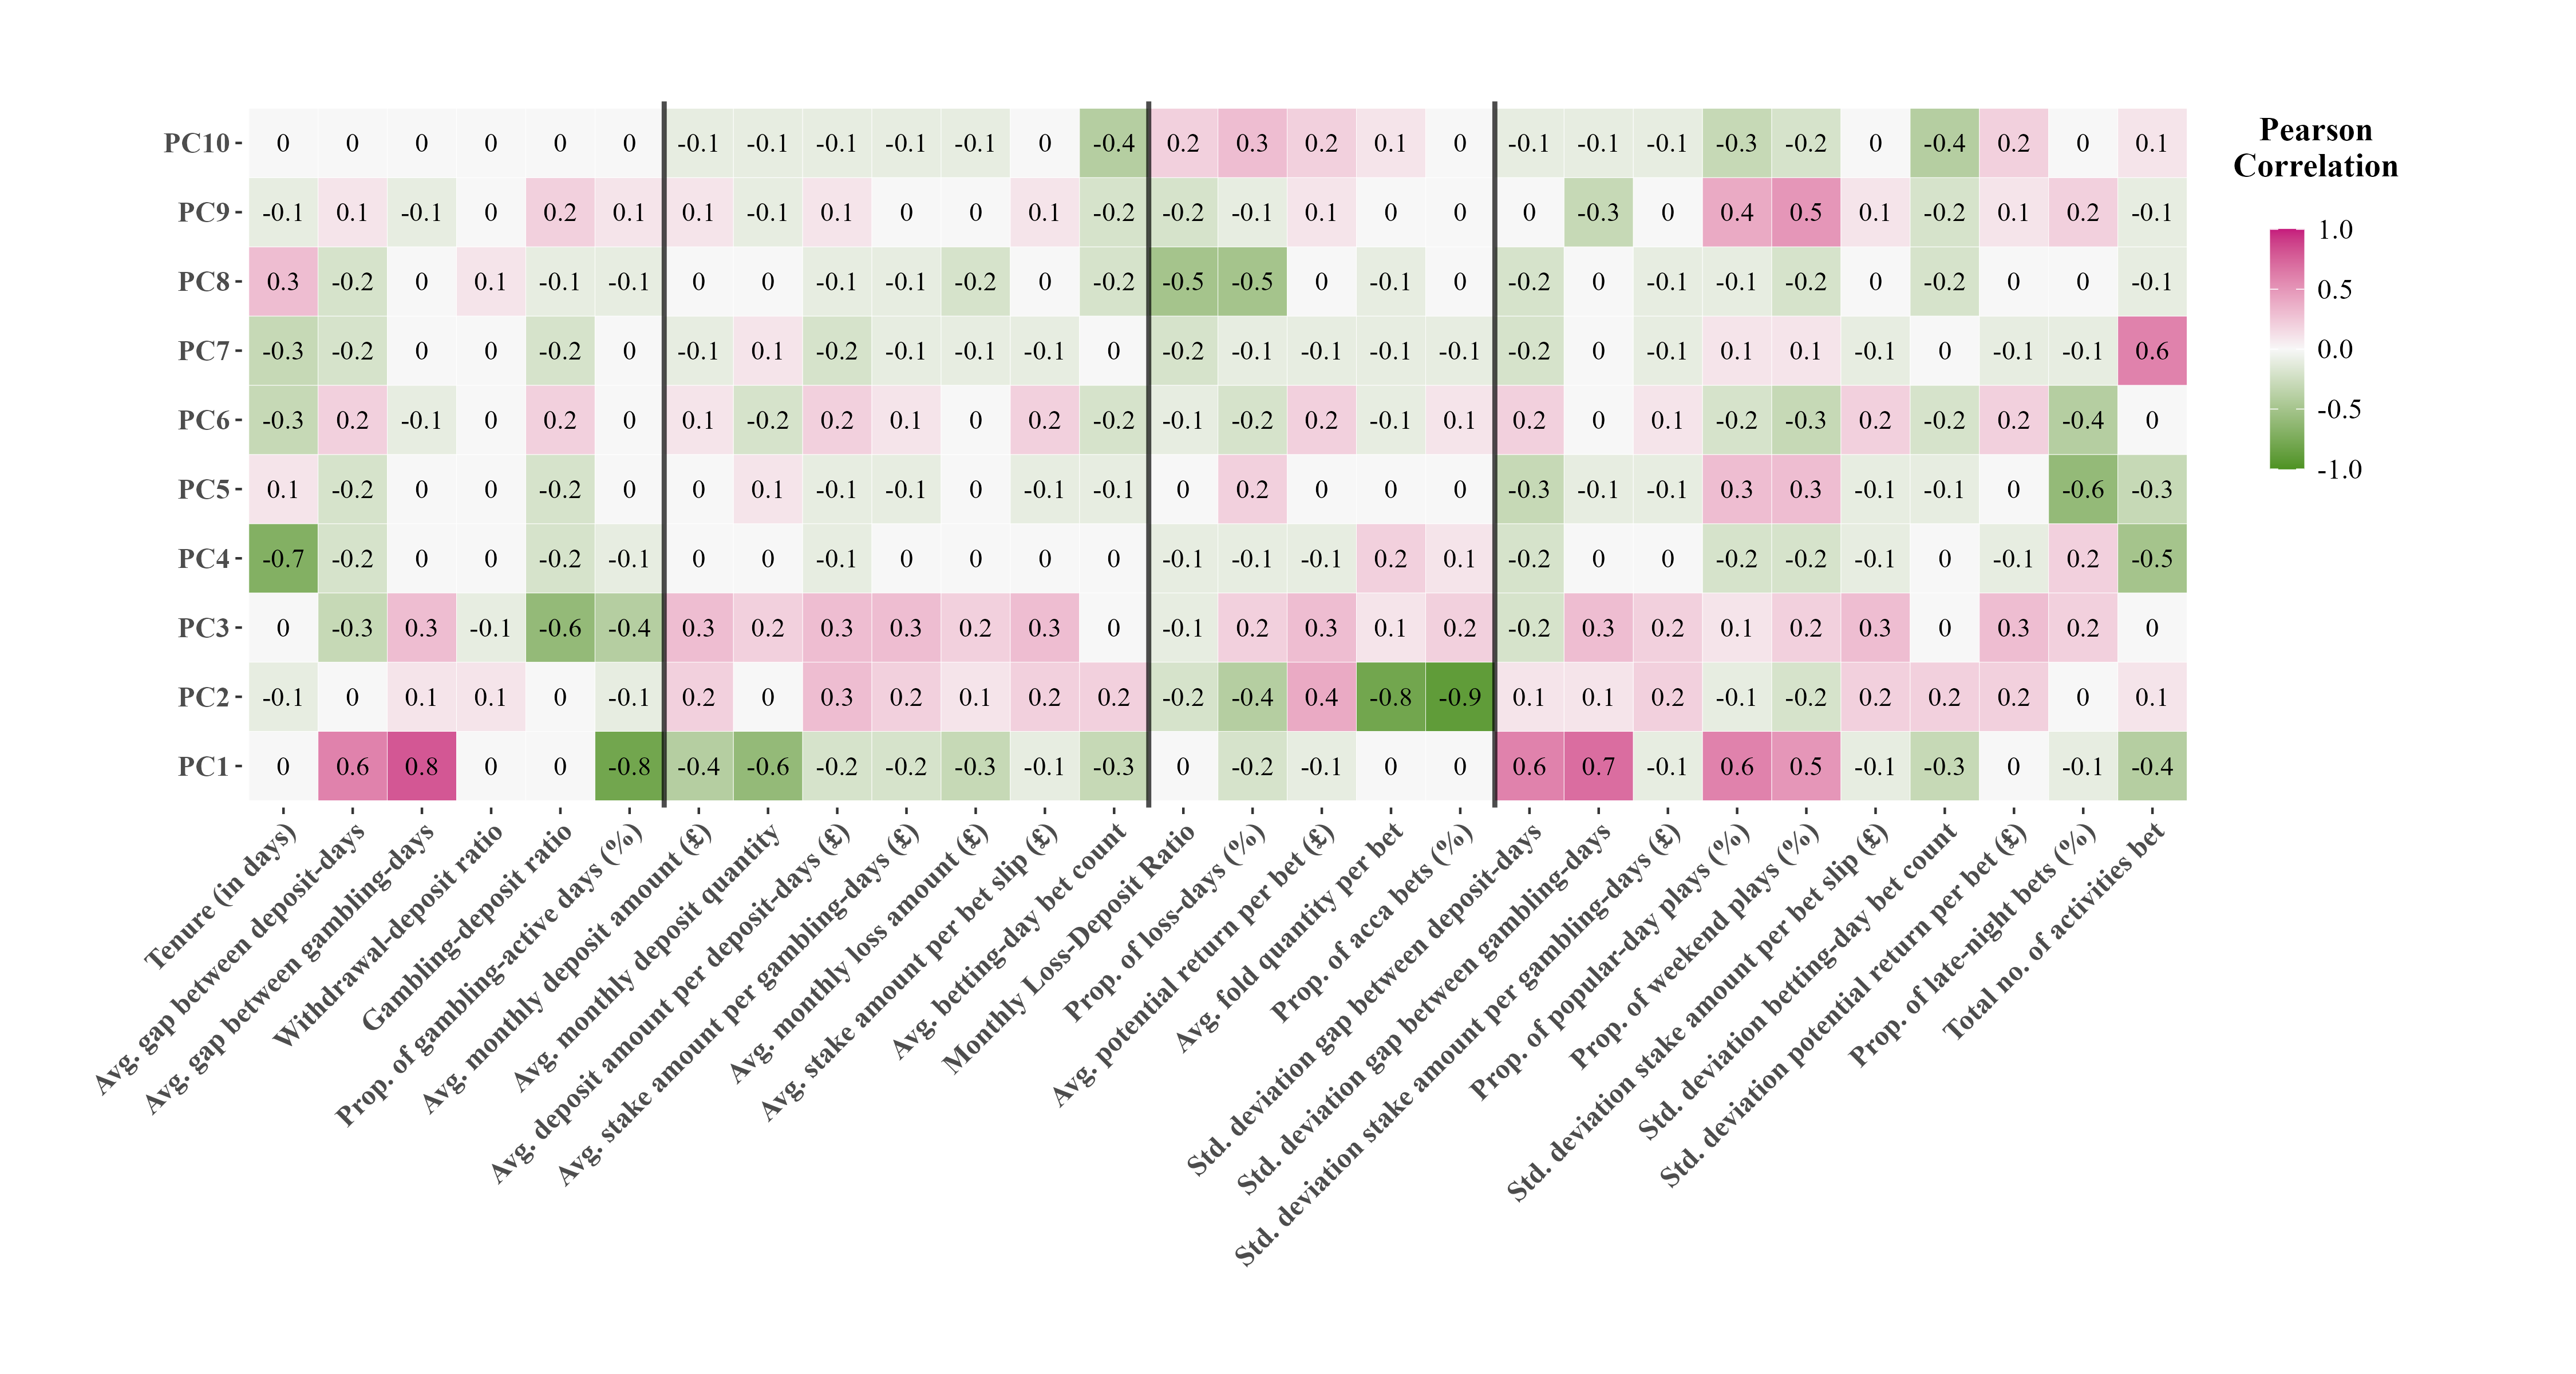Table SM.2: Component-feature correlation matrix for the Betting-Exclusive (B) group. |
| --- |

| 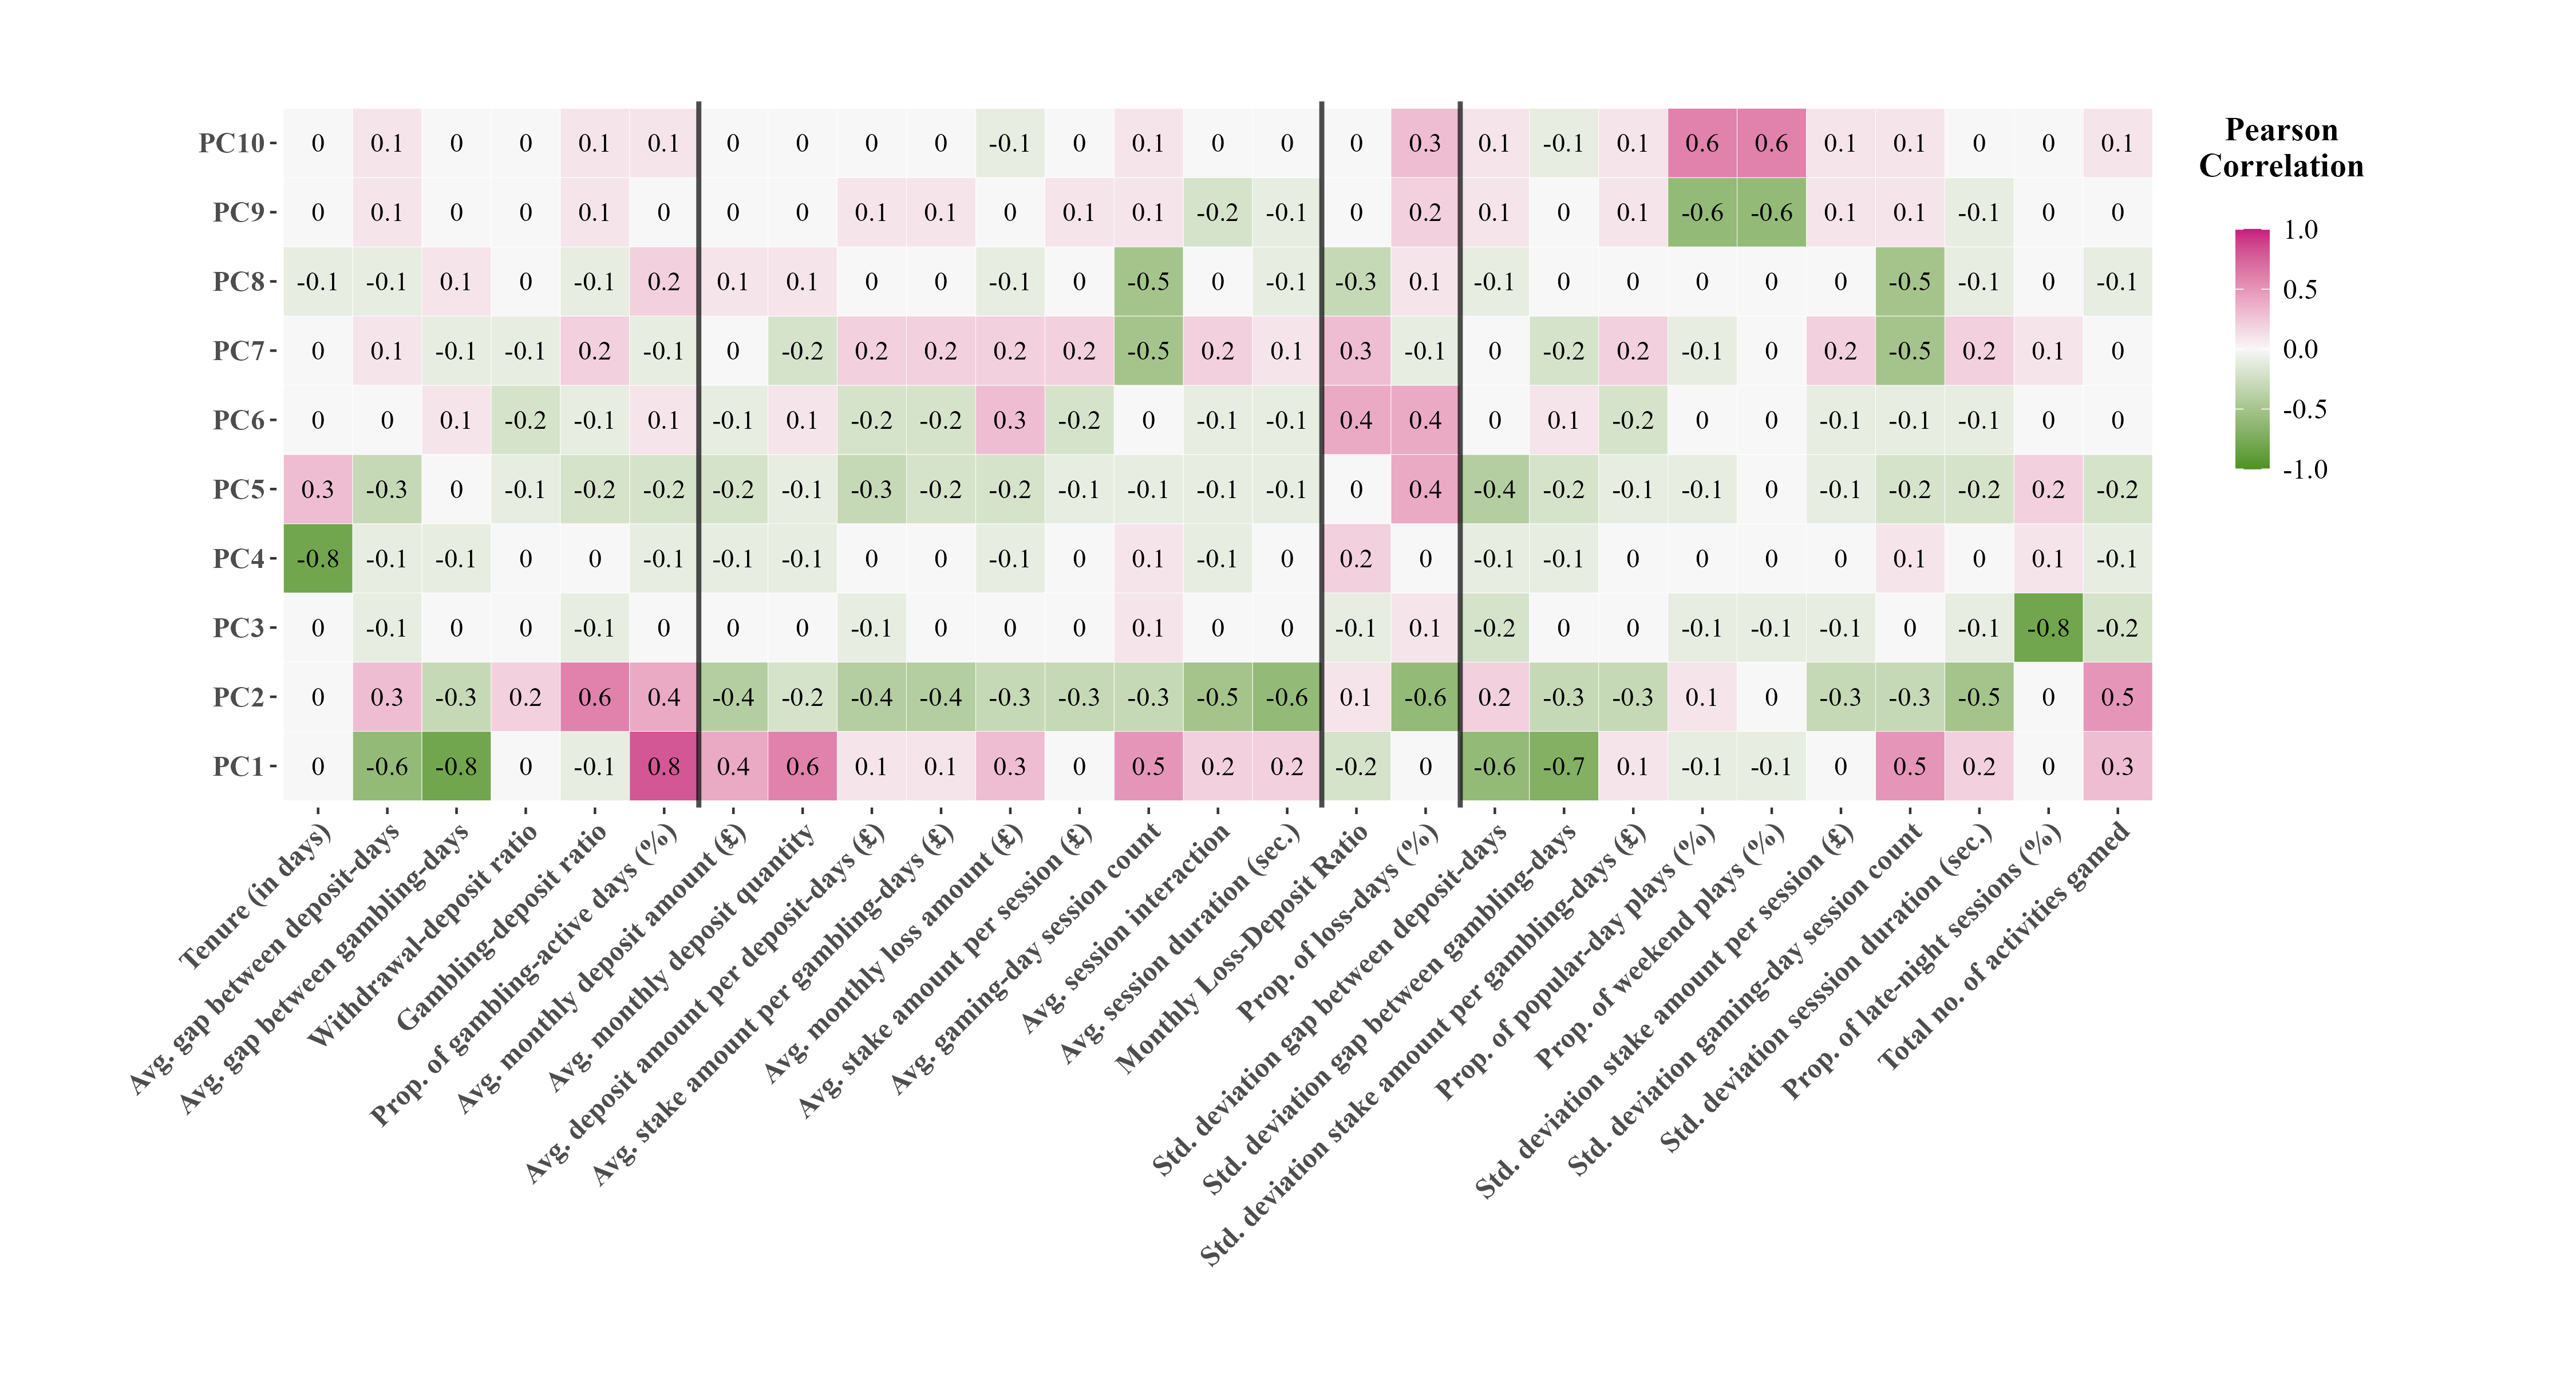Table SM.3: Component-feature correlation matrix for the Gaming-Exclusive (G) group. |
| --- |

## Cluster selection diagnostics

The clustergrams in [Figure SM.2](#fig-clustergram-both), [Figure SM.3](#fig-clustergram-bet) and [Figure SM.4](#fig-clustergram-gam) show how cluster membership and separation evolved across alternative values of for each active group. Line widths, scaled by cluster membership size, and vertical dispersion of cluster means illustrate how observations move between clusters across a range of solutions, providing insight into both compactness and interpretability. Because of hardware memory limitations in the secure research environment, clustergrams were derived from three independent trials of 50,000 randomly sampled individuals per group. Parsimony guided the final selection, prioritising solutions with clear separation and manageable substantive interpretation while avoiding over-fitting, particularly for the smaller B and G groups.

| 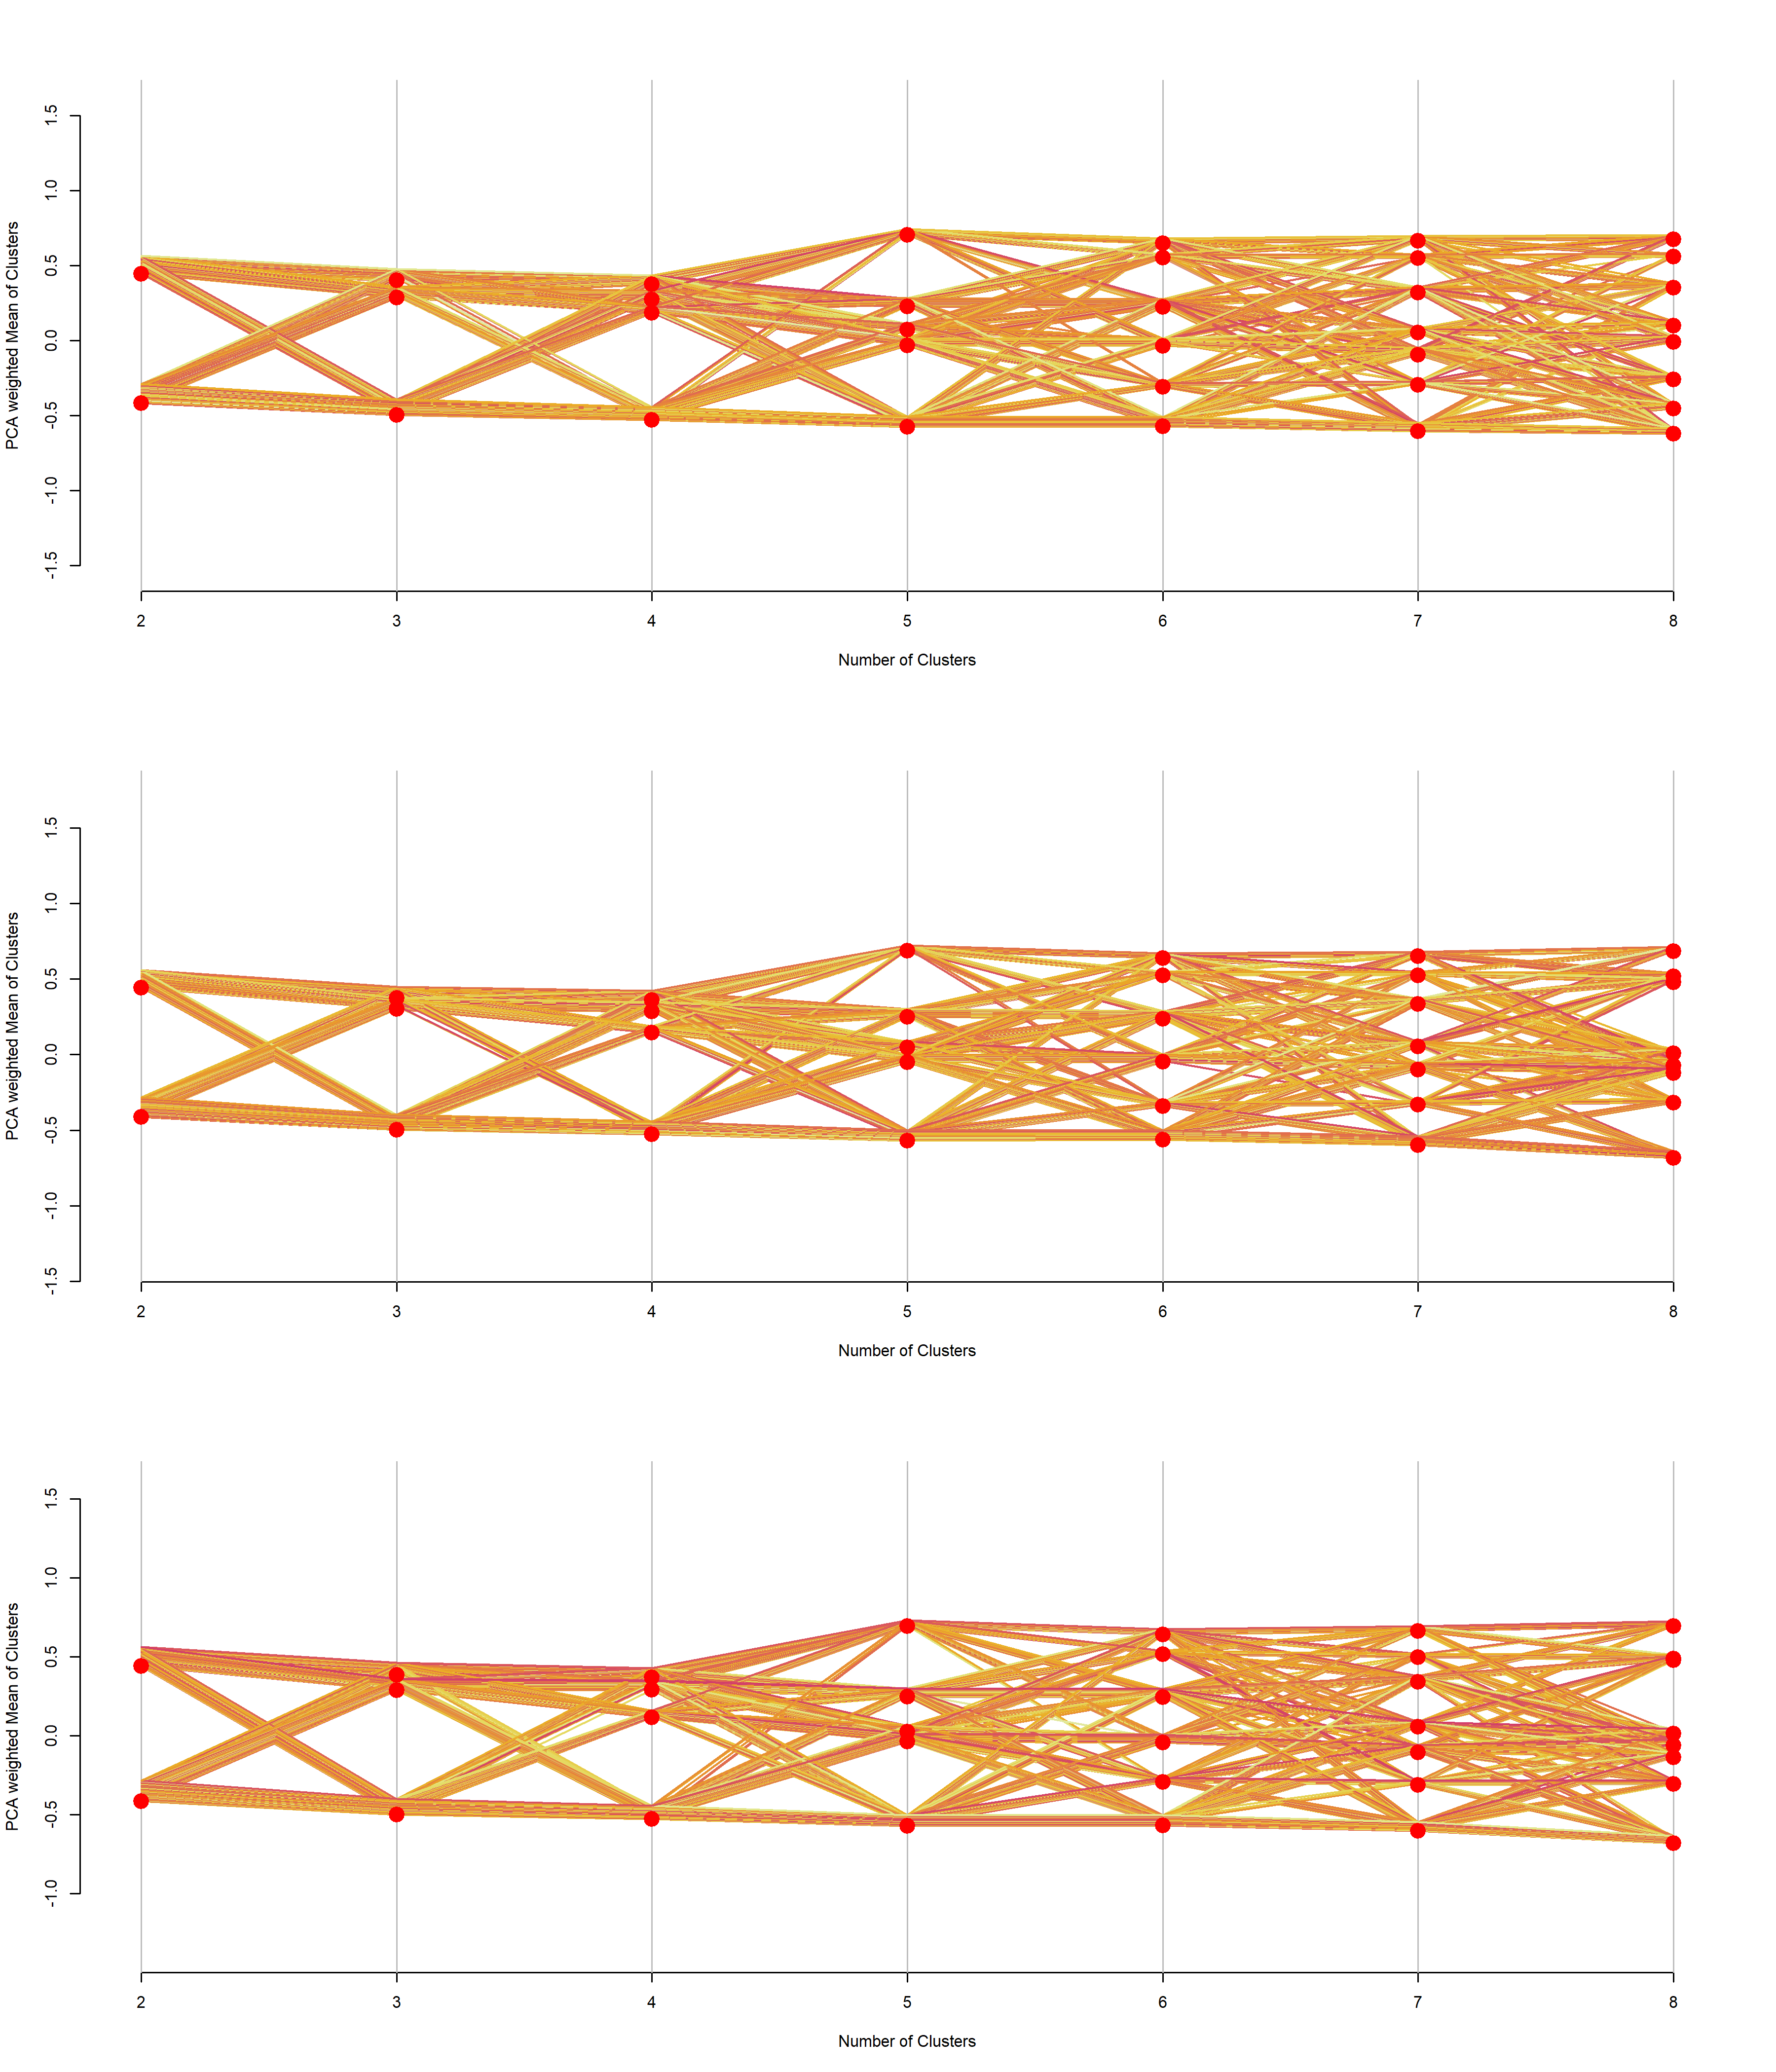  Figure SM.2: Clustergram for the Betting-and-Gaming (BG) group across alternative values of . |
| --- |

| 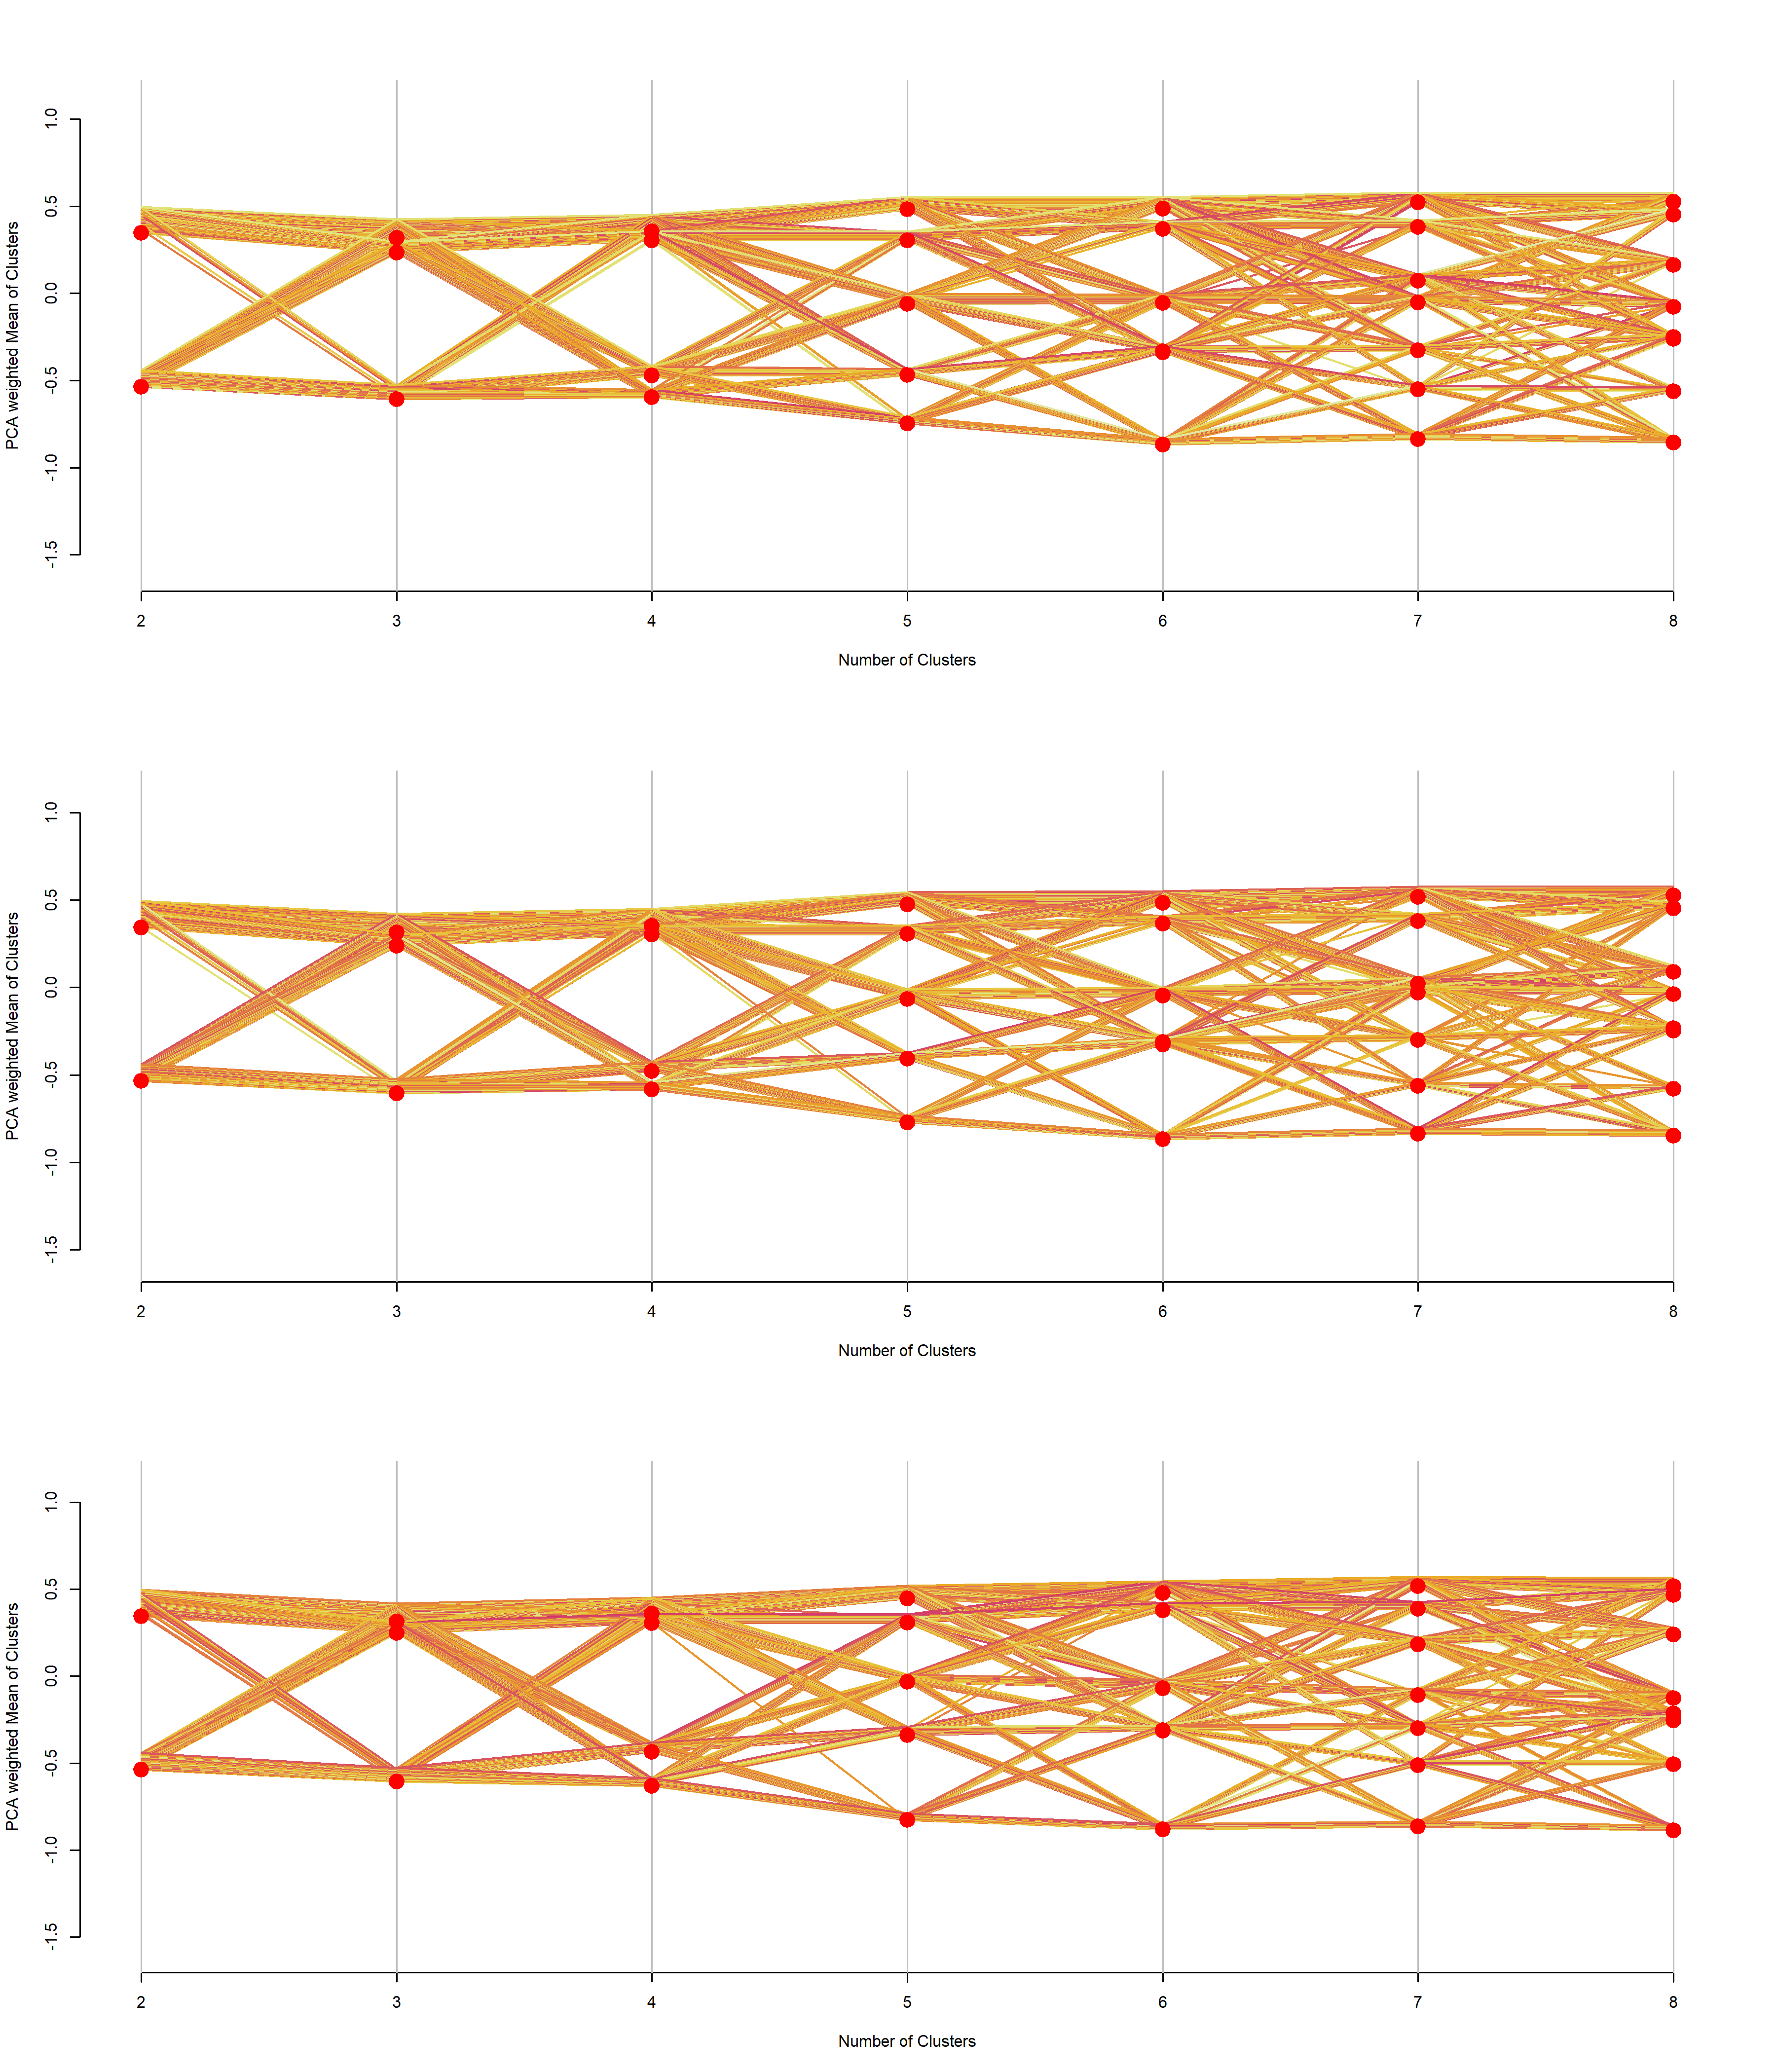  Figure SM.3: Clustergram for the Betting-Exclusive (B) group across alternative values of . |
| --- |

| 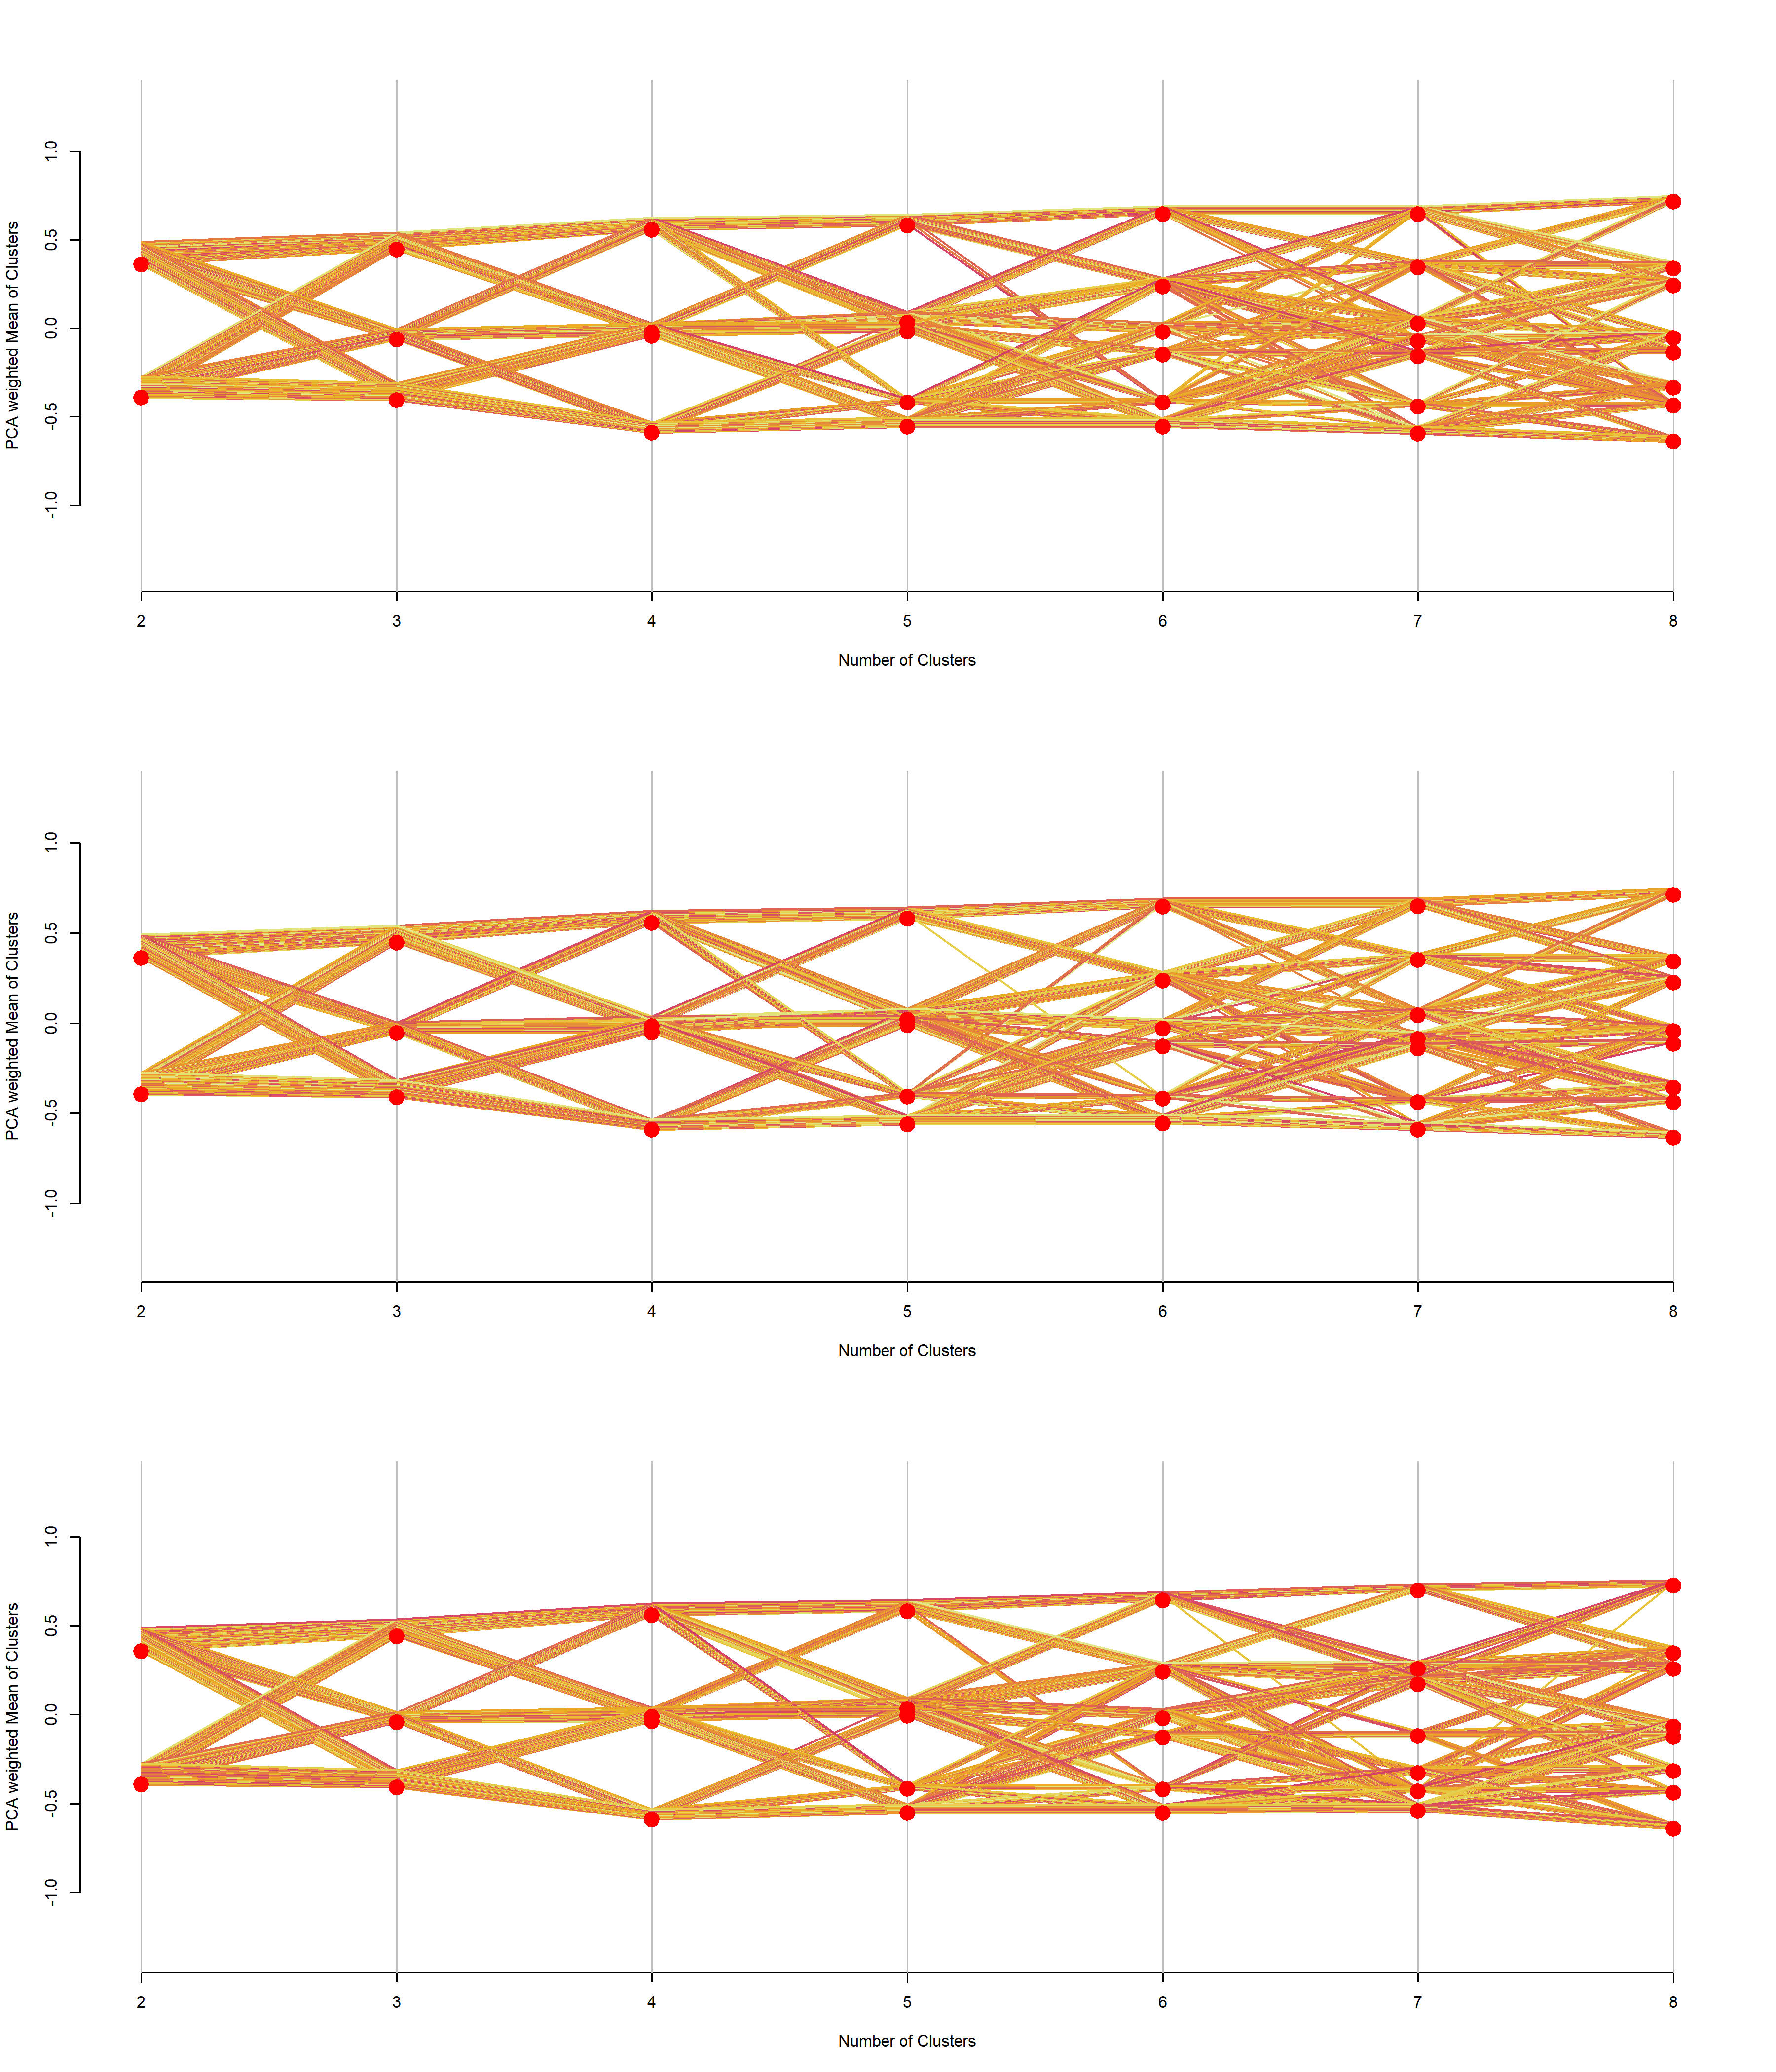  Figure SM.4: Clustergram for the Gaming-Exclusive (G) group across alternative values of . |
| --- |

## Detailed cluster profiles

The following tables provide expanded numerical summaries of the behavioural features used to interpret the cluster structures in the manuscript.


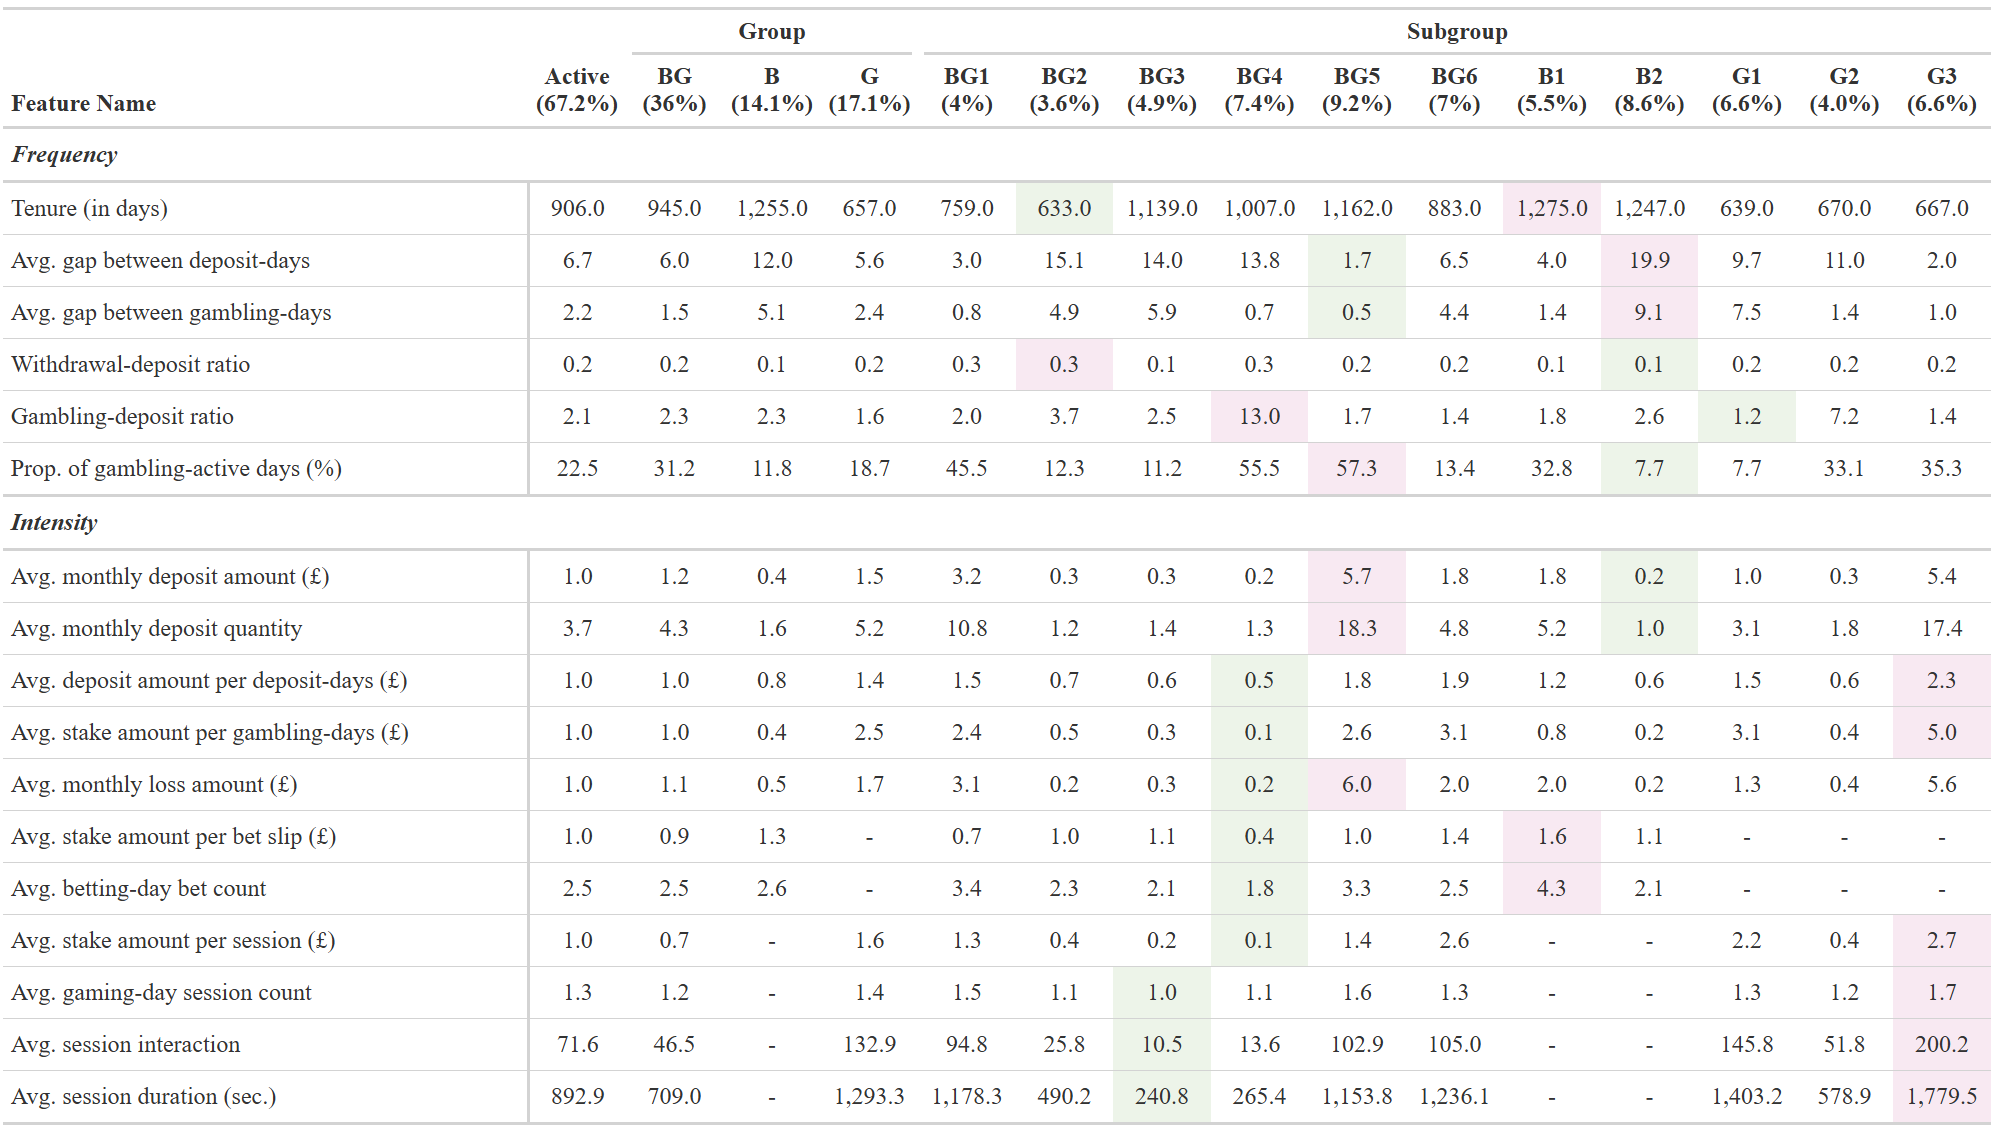


| Table SM.4: Detailed cluster feature table for the main set of subgroup profiles. Median values of features, with the minimum and maximum values in each row highlighted in green and pink, respectively. Features marked with a ‘£’ symbol were normalised to ratios using the active gambler average as the baseline. |
| --- |


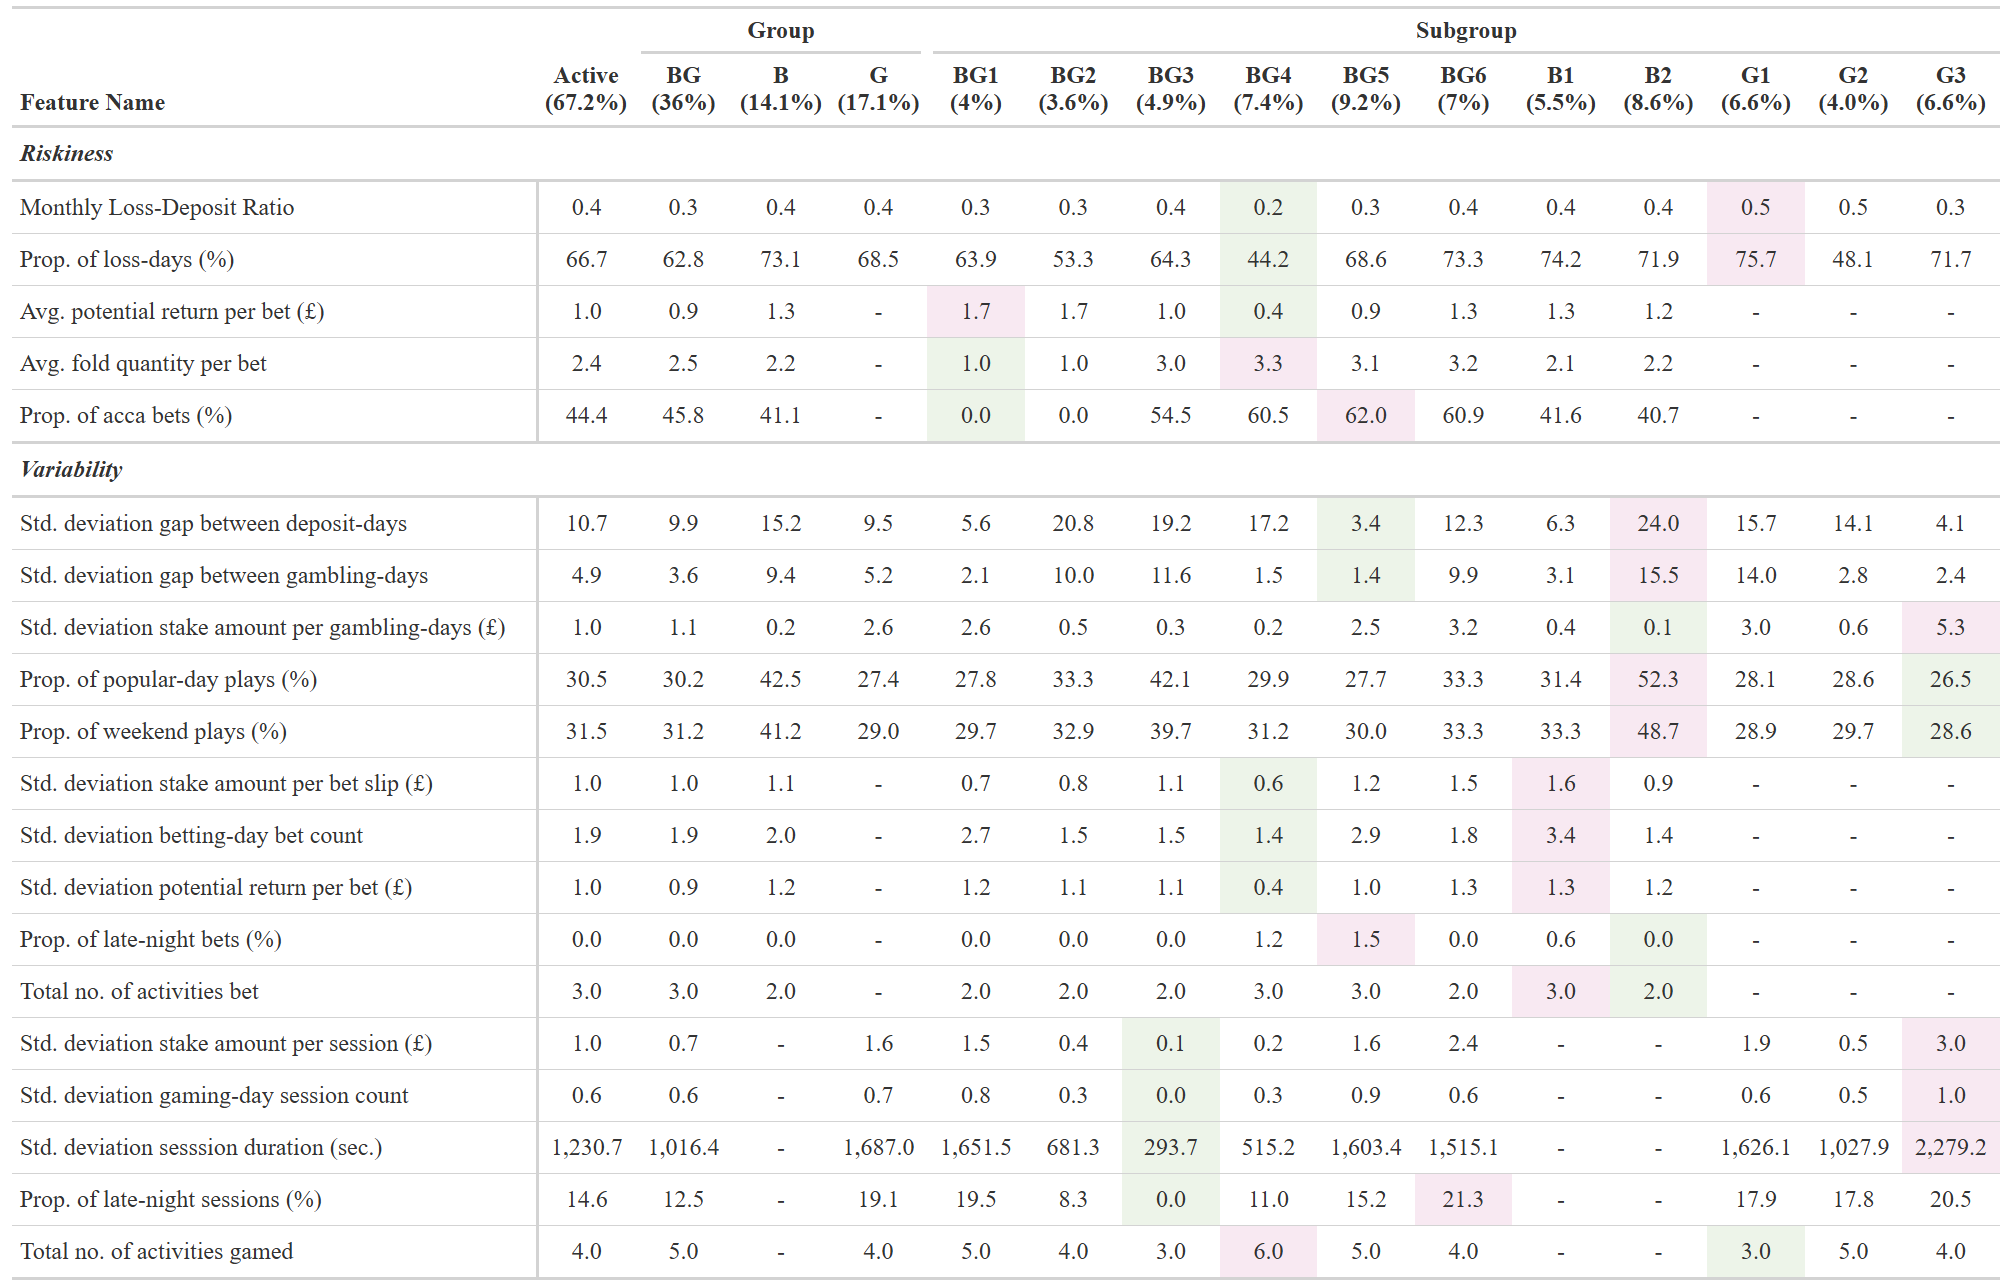


| Table SM.5: Detailed cluster feature table for the remaining subgroup profiles. Median values of features, with the minimum and maximum values in each row highlighted in green and pink, respectively. Features marked with a ‘£’ symbol were normalised to ratios using the active gambler average as the baseline. |
| --- |

## Pen portraits

This section provides detailed pen portraits for each of the 12 behavioural types, plus thre residual Others category. The 11 Active types are organised into three activity Groups —BG, B and G — alongside a Dormant type. Others comprises the remaining adult population and is estimated only at LSOA level. Each pen portrait describes the distinctive gambling patterns, demographic composition and neighbourhood associations of a given type, facilitating comparison across the classification.

### Active Gamblers

**BG: Betting-and-Gaming Participants**

Comprising the largest share within the Active Gamblers, Group BG includes individuals who actively participate in both betting and gaming. BG types display substantial diversity in gambling behaviours: for instance, types BG4 and BG5 share similar high-frequency play patterns but very different intensities of play and profitability, while BG1 and BG3 have contrasting inclinations towards betting or gaming.

Demographically, Group BG is also heterogeneous. Some types, such as BG2, have higher-than-average female participation, while BG6 remains overwhelmingly male. Despite these differences, members’ living conditions and lifestyles are similar, generally mirroring the broader Active Gambler pattern. However, there are also subtle variations in socio-economic associations: BG1, BG4 and BG5 are more strongly associated with neighbourhood deprivation, while BG2, BG3 and BG6 are not.

**BG1: Engaged New-Age Gamblers**

Participants are heavily engaged in both frequency and intensity of play, gambling on 166 days per annum (45.5% of all days) with minimal seasonal fluctuation. This activity is evenly distributed throughout the year, indicating a sustained and broad-based interest in gambling. Daily average stakes are 2.4 times the Active Gambler average, typically placed during one or two 20-minute gaming sessions with stakes 30% higher than the Active Gambler average, or three to four bets with low stakes and long odds. Participants accrue net wins on approximately one-third of gambling days, in line with the Active Gambler average. However, typical monthly losses are more than three times the Active Gambler average, reflecting substantial financial exposure associated with patterns of high-frequency, high-intensity gambling behaviour.

A defining characteristic is strong preference for newer or niche gambling products. Rather few participants allocate more than 5% of their total stakes to football (13.6%) or horse racing (23.9%) — the lowest among all types. In contrast, participation in virtual sports is 1.8 times higher than the Active Gambler average; and engagement with slots is common (70.1%). These preferences align with broader shifts in online gambling behaviour since COVID-19, when lock-down restrictions reduced access to physical venues and the effect of suspension of many sporting events was to increase engagement with alternative gambling products. Their average account tenure of approximately two years coincides with this shift to new-age gambling.

Participants also share geodemographic and spatial profiles with Group G, albeit that female representation in this type is slightly lower (33.5%), and they are even more geographically dispersed across GB neighbourhoods.

**BG2: Newcomers with Sporadic and Moderate Patterns of Play**

Participants in this type are typically males under 45, with highest participation amongst 18–24-year-olds. Female participation is the highest (36.8%) in the Group. At just under a year, participants have the shortest average account tenure among Active Gamblers. Behaviours are characterised by sporadic gambling (45 days per annum), with intensity as measured by deposit amount and session duration below the Active Gambler average. Participants make more cash-out withdrawals relative to deposits than any other type, indicating finance management. Losses accrue on 53.3% of gambling days — the lowest rate in the Group. 36% of participants accrue an annual profit, the second highest among all types.

Betting activity tends to be event-driven, peaking around major sporting events such as the Cheltenham Festival (March) and Grand National (April). At these times participants stakes are around the Active Gambler average — not high in cash terms but weighty relative to low deposit amounts at other times. Single-fold bets with long odds are common. Less than half of participants allocate more than 5% of their total stakes to betting activities, indicating that even major events are a sideline to moderate patterns of play in gaming rather than betting. Participants engage in diverse gaming formats, including bingo (5.6%) and roulette (14.1%). Gaming session stakes are typically less than half the average of Groups BG and G, indicating a more measured approach to gaming than their sporadic, high-risk betting behaviour.

Despite their focus on gaming rather than betting, the geodemographic profile closely resembles the B Group. Within the BG Group, there is only a weak association with living conditions and lifestyle factors, albeit that this association is slightly stronger than in Group B.

**BG3: Event-Driven Speculative Players**

Adult males in early to mid-life predominate, and females make up just 16.2% of all participants — around 10% lower than the Active Gambler average. Participants typically gamble on 41 days per annum (11.2% of all days), the lowest within the BG Group, and daily deposits are also below BG Group average, suggesting a controlled and measured approach rather than impulsive or excessive play.

Gambling behaviour is highly and predictably event-driven, with the highest proportion of activity occurring on popular days (42.1%) and weekends (39.7%) within Group BG. Participants are strongly committed to mainstream sports betting categories — football (80.6%), horse racing (59.3%) and combat sports (7.7%) — with peak engagement aligned with major events such as English Premier League and Cup football fixtures and the Cheltenham Festival (March). Acca bets are preferred to single-folds, often placed at longer odds per bet slip, suggesting a speculative approach. Participation in gaming activities is the lowest across all BG and G Groups and is typically spread across slots (38.3%), multiple games (36.4%) and jackpot slots (18.1%). Gambling intensity is consistently low and typically confined to brief, single daily sessions averaging just four minutes. 25.9% of individuals achieve a monthly profit, slightly above the Active Gambler average.

Geodemographically, participants’ neighbourhood profile closely resemble that of Group B, but with particular emphasis upon OAC Group 7b (Young Families in Industrial Towns): areas characterised by young populations, predominantly UK-born, challenged by high unemployment and low educational attainment.

**BG4: Mindful Entertainment Seekers**

Participants include many of the most frequent gamblers, actively participating on 203 days per annum (55.5% of all days) at regular intervals. Despite this high frequency, play is sustained by infrequent and modest deposits, typically placing 13 bets before each new deposit. Deposits are approximately half the Active Gambler average, and the interval between deposits is more than six times longer. Taken together, this indicates a strategic and mindful approach to maintaining continuous engagement using limited financial resources. Participants record the lowest stake per betting slip or gaming session, indicative of a low-intensity, low-risk approach. Participants also pursue the most diverse range of activities, with an average of nine, of which three are betting and six gaming. Less conventional gaming activities, such as live game shows, are three times more popular than the Groups BG and G average (40.6%). Bets tend to be placed at shorter odds with multiple folds, suggestive of risk management. This conservative yet varied approach turns monthly profits for 39.7% of participants — the highest rate amongst all types.

The geodemographic composition mirrors the Active Gambler average. Males aged 18–24 and 40–44 are marginally over-represented, whereas the female proportion is slightly lower (17.9%) than the Active Gambler average. The geographic distribution shows the strongest spatial autocorrelation, with pronounced cold-spots occurring across southern England. Geodemographically, OAC Group 8a (Routine Occupations or Retirement) is very prevalent — characterised by high population densities, high unemployment rates, employment dominated by routine occupations, low incidence of higher education attainment and prevalent health challenges. There is a moderately stronger association with higher neighbourhood deprivation compared to the Active Gambler average.

**BG5: High-Frequency High-Stake Losers**

Participation is high frequency, high intensity, taking place on 209 days per annum (57.3% of all days) at regular intervals, of which just 27.7% fall on popular days — the lowest within the BG Group. Other gambling days are dispersed throughout the year. Unlike participants in type BG4, who gamble on a similar number of days, frequent deposits are made, typically 18 times a month — the highest among Active Gamblers. Daily deposits are not the highest amongst all types, they are 1.8 times the Active Gambler average totals, and the sheer frequency of deposits requires median monthly deposits that are 5.7 times the Active Gambler average. The substantial investment of both time and money results in this type having the lowest proportion of participants turning a profit (10.1%), while average monthly loss amounts are six times higher than the Active Gambler average. Despite these adverse outcomes, participants are the most established cohort within the BG Group, with typical registration periods exceeding three years.

Demographically, this type closely resembles the typical Gambler, with a slight under-representation of males aged 18–24 and a slight over-representation of males aged 35–44. The female proportion is lower (16.5%) than the Active Gambler average. Geodemographically, members exhibit the strongest association with high neighbourhood deprivation within the BG Group.

**BG6: Young Occasional Binge Players**

These predominantly young adult males are predominantly drawn from the 18–39 Cohort, peaking between ages 30–34. Female representation is the lowest within the BG Group (14.5%). Frequency of play is below the Active Gambler average, typically participating 50 days per annum (13.4% of all days). Engagement is infrequent but interspersed with bursts of intense activity. Activity aligns closely with major sporting events, particularly on Saturdays in the football season, and a pronounced decline out of season in June and July. A pronounced surge occurs for the Grand National (early April). The substantial commitment to betting on football (40.1% of participants) is not mirrored by horse racing (21.7% of participants), which is below the Active Gambler average. There is strong commitment to gaming activities, such as slots (64.4% of participants) and multiple games (79.5%). These patterns suggest susceptibility to event-driven marketing and cross-selling, where individuals initially drawn to major sports events transition towards unrelated gaming products.

Although gambling frequency is low, intensity of play is amongst the highest within the BG Group. On active gambling days, members typically place some of the largest stakes within the Group, evenly distributed across betting and gaming activities. Gaming sessions are prolonged, averaging 20 minutes per session — among the longest in the Group. 21.3% of gaming sessions occur late-night, the highest proportion across all types, consistent with a pattern of binge-gambling. Betting is predominantly structured around accumulator bets (60.9%), with potential returns 1.3 times higher than the Active Gambler average, suggesting a preference for high-risk, high-reward wagers. Participants incur losses on 73.3% of gambling days, the highest proportion within the Group. 17.1% of participants nevertheless turn a monthly profit, indicating that while frequent losses are common, there are some benefits from the volatility inherent in this gambling style.

Geodemographically, participants closely resemble the Active Gambler average but are slightly less prevalent in the most deprived areas.

### B: Betting-Exclusive Participants

This group consists of gamblers who engage exclusively in betting activities. With a median tenure of approximately 3.4 years, they represent the most established customers across the types. Their demographic profile is predominantly male and includes the oldest participants. While gambling behaviours within the group vary in terms of frequency, intensity and variability, their risk-taking approach remains relatively consistent. Members employ similar betting strategies, balancing a mix of bet slip types with a slight preference for single-fold bets over accumulators. Despite their sustained participation, their overall gambling outcomes are the worst across the groups, with an average of 73.1% of betting days resulting in losses, suggesting that winning may not be their primary motivation. Geodemographically, this Group is the most diverse and shows the weakest association with socio-economic hardship among all types, reflecting a broad and varied customer base.

There are distinct clusters in Scotland, particularly on the outskirts of Glasgow and Edinburgh, with concentrations extending into rural areas of Southern Scotland and coastal cities such as Dundee and Aberdeen.

**B1: Longstanding Habitual Veterans**

This type has the highest proportion of males among all types, predominantly skewed towards Boomers (aged 50+). Participants typically gamble on 120 days per annum (32.8% of all days). Betting behaviours are marked by relatively stable daily expenditure, yet individual wagers vary considerably, with individuals typically placing four to five bets per gambling day of differing sizes. Their engagement spans multiple betting activities, reflecting deep-rooted, habitual gambling patterns that are not strictly aligned with major sporting calendars. Geodemographically, they are disproportionately over-represented in neighbourhoods characterised by routine occupations or retirement populations (OAC Group 8a). There are slightly stronger presence in London compared to other types.

**B2: Well-Resourced Hobbyists**

Predominantly male, participants are drawn from the full adult age spectrum. They reside in a wide range of neighbourhood types that are typically less deprived than average. They gamble infrequently (28 days per annum), but in a predictable and low-intensity pattern, principally at weekends or around major sporting events. Football betting is particularly common, attracting over 80% of participants. Low withdrawal-to-deposit ratios suggest a recreational approach, in which winnings remain in gambling accounts rather than being cashed out.

### G: Gaming-Exclusive Participants

Participants engaging exclusively in gaming activities tend to hold accounts for shorter periods than those in other Groups. The gender balance is even and predominantly under 45, with elderly males noticeably absent. Participation is a year-round activity, with the lower seasonal variations than in other Groups. Participants are predominantly drawn from deprived communities, with few resident in geodemographically salubrious neighbourhoods.

Geographically, participation is clustered along coasts, with notable hotspots in: the Fens around Boston and King’s Lynn; the South East, notably in Dover and Margate; and in Newport, South Wales.

**G1: Episodic High Risk Takers**

These infrequent participants typically engage in short bursts of intense gambling followed by extended periods of inactivity, averaging gambling activity on only 28 days per annum (7.7% of all days). Participation is unpredictable in terms of both frequency and size of stakes. Participants are very likely to inject substantial new funds into their accounts on days in which they gamble. These tight deposit-to-play cycles suggest loose finance management and impulsive behaviour. The intensity of play during each gaming session on a typical gambling day is substantially higher than the Group average. Net losses accrue on more than 75% of gambling days, yet 17.7% of participants turn a profit in any given month. This indicates that while net losers predominate, high-volatility, binge-style patterns of play can nevertheless yield positive returns.

**G2: Mindful Low-Rollers from Deprived Communities**

This type has the highest female representation (46.7%) and participants are drawn predominantly from challenged neighbourhoods. Attitudes to risk are typically conservative, manifested in consistent yet cautious engagement with minimal financial exposure through low deposits and stakes. Participants have the lowest gambling–deposit ratios in the Group and make infrequent top-ups to fund gambling days that are fairly or very frequent (121 days per annum). Winnings tend to be recycled. As one of just two types that experience more winning than losing days, 26.7% of customers accrue profits in a typical month — the highest percentage in the Group. While participants remain active throughout the year, participation peaks around mid-March. This may be driven by general seasonal promotional campaigns, albeit that participants do not participate in the seasonal betting activities.

**G3: High-Stakes Gamers from Deprived Communities**

Members of this type sustain consistent gaming patterns throughout the year, participating on 129 days per annum (35.3% of all days). This type has the most heterogeneous gaming behaviour across all intensity metrics, including deposit amounts, wager sizes, session interactions and session durations. Participants’ high average number of deposits, averaging 17.4 per month, may suggest limited control over spending. High-stake and volatile gambling behaviours are associated with high monthly losses, with only 11% turning monthly profits. Gaming patterns are highly unpredictable, with no evident temporal trends such as weekend peaks or other popular days. Participants in this type typically reside in deprived neighbourhoods, though not as markedly as type G2.

### Dormant Gamblers

Dormant Gamblers have gambling accounts but have not sustained participation over time. They do not meet the thresholds used to define Active Gamblers, viz. they either gamble less than once per month, engage in only a single betting or gaming session in a year or have a tenure of less than three months. This type includes individuals who may have experimented with gambling before disengaging, as well as those who participate only occasionally. Their irregular or immature gambling patterns distinguish them from Active Gamblers, who engage more consistently.

Demographically, Dormant Gamblers tend to be slightly younger than Active Gamblers, with a higher proportion of individuals aged under 40. Geographically, their distribution largely mirrors that of Active Gamblers, but with a distinct concentration around Cheltenham, a major hub for Cheltenham Festival, an international horse racing event. Gambling activity is largely confined to mid-March and early April, aligning with the Festival, suggesting that this high-profile event may be a huge pull factor for individuals who would otherwise not gamble. Geodemographically, Dormant Gamblers reside in a diverse range of backgrounds, reflecting broader variability in socio-economic circumstances compared to more defined Active gambling types.

### Others

Others are individuals with no recorded traces of online gambling. If they hold an account, their gambling behaviour does not meet the criteria for the Active or Dormant types. Individuals in this category include: (i) one-off players, who deposited cash once but neither deposited nor played again; and (ii) free-rollers, who participated only with free stakes or wagers without ever making a cash deposit.
